1 **TITLE:**

2 Location bias contributes to functionally selective responses of biased CXCR3 agonists

3

4 **AUTHORS:**

5 Dylan Scott Eiger<sup>1</sup>

6 Noelia Boldizar<sup>2</sup>

7 Christopher Cole Honeycutt<sup>2</sup>

8 Julia Gardner<sup>2</sup>

9 Stephen Kirchner<sup>3,4</sup>

10 Chloe Hicks<sup>2</sup>

11 Issac Choi<sup>5</sup>

12 Uyen Pham<sup>1</sup>

13 Kevin Zheng<sup>2</sup>

14 Anmol Warman<sup>2</sup>

15 Jeffrey Smith<sup>6-10</sup>

16 Jennifer Zhang<sup>3</sup>

17 Sudarshan Rajagopal<sup>1,5,\*,°</sup>

18 \* = corresponding author

19 ° = lead contact

20

21 **AFFILIATIONS:**

22 <sup>1</sup>Department of Biochemistry, Duke University, Durham, NC, 27710, USA

23 <sup>2</sup>Trinity College, Duke University, Durham, NC, 27710, USA

24 <sup>3</sup>Department of Dermatology, Duke University, Durham, NC, 27707, USA

25 <sup>4</sup>Department of Molecular Genetics and Microbiology, Duke University, Durham, NC, 27707, USA

26 <sup>5</sup>Department of Medicine, Duke University, Durham, NC, 27710, USA

27 <sup>6</sup>Department of Dermatology, Massachusetts General Hospital, Boston, MA, 02114, USA

28 <sup>7</sup>Department of Dermatology, Brigham and Women's Hospital, Boston, MA, 02115, USA

29 <sup>8</sup>Department of Dermatology, Beth Israel Deaconess Medical Center, Boston, MA, 02215, USA

30 <sup>9</sup>Dermatology Program, Boston Children's Hospital, Boston, MA, 02115, USA

31 <sup>10</sup>Harvard Medical School, Boston, MA, 02115, USA

32

33 **CORRESPONDENCE**

34 [sudarshan.rajagopal@duke.edu](mailto:sudarshan.rajagopal@duke.edu)

35

36 **SUMMARY**

37       Some G protein-coupled receptor (GPCR) ligands act as “biased agonists” which preferentially activate  
38 specific signaling transducers over others. Although GPCRs are primarily found at the plasma membrane,  
39 GPCRs can traffic to and signal from many subcellular compartments. Here, we determine that differential  
40 subcellular signaling contributes to the biased signaling generated by three endogenous ligands of the  
41 chemokine GPCR CXCR3. The signaling profile of CXCR3 changed as it trafficked from the plasma membrane  
42 to endosomes in a ligand-specific manner. Endosomal signaling was critical for biased activation of G proteins,  
43  $\beta$ -arrestins, and ERK1/2. In CD8<sup>+</sup> T cells, the chemokines promoted unique transcriptional responses predicted  
44 to regulate inflammatory pathways. In a mouse model of contact hypersensitivity,  $\beta$ -arrestin-biased CXCR3-  
45 mediated inflammation was dependent on receptor internalization. Our work demonstrates that differential  
46 subcellular signaling is critical to the overall biased response observed at CXCR3, which has important  
47 implications for drugs targeting chemokine receptors and other GPCRs.

48

49 **KEYWORDS:** beta-arrestin, G protein-coupled receptor, biased agonism, chemokine, CXCR3, endosome, MAP  
50 kinase, location bias, inflammation, bioluminescence resonance energy transfer

51

## 52 INTRODUCTION

53 G Protein-Coupled Receptors (GPCRs) are the largest superfamily of membrane proteins, accounting  
54 for about 5% of all genes encoded in the human genome (Zhang et al., 2006), and are the target of approximately  
55 35% of all Food and Drug Administration-approved drugs (Sriram and Insel, 2018). GPCR signaling is mediated  
56 by effectors including G proteins, GPCR kinases (GRKs), and  $\beta$ -arrestins, which modulate the activity of a variety  
57 of signaling pathways, like those mediated by cyclic adenosine monophosphate (cAMP), extracellular-signal-  
58 regulated kinase (ERK), and protein kinase A (PKA) (Wootten et al., 2018). GPCR signaling is implicated in a  
59 wide range of normal physiologic processes (Kamal and Jockers, 2011), and the dysregulation of GPCRs is  
60 associated with various pathologies (Zalewska et al., 2014). Ligand:receptor interactions at GPCRs can  
61 preferentially activate certain signaling pathways over others in a ligand-, receptor- or cell-dependent manner, a  
62 phenomenon referred to as 'biased agonism' or 'functional selectivity' (Smith et al., 2018a). There is a desire to  
63 develop *biased agonists* that selectively activate some signaling pathways over others to generate beneficial  
64 physiologic responses while reducing off-target effects. However, the molecular mechanisms underlying biased  
65 signaling remain unclear.

66 Adding to this complexity has been the realization that GPCRs can signal from subcellular compartments  
67 with altered signaling profiles, resulting in 'location bias' as an additional mechanism of signaling specificity  
68 (Calebiro et al., 2009; Irannejad et al., 2017; Tsvetanova and von Zastrow, 2014). GPCRs can undergo receptor-  
69 mediated endocytosis and be recycled back to the plasma membrane, targeted to lysosomes for degradation,  
70 or trafficked to specific subcellular locations (Irannejad et al., 2015). It was previously thought that GPCR  
71 internalization abolished signaling by limiting the membrane-accessible GPCR pool or via receptor degradation  
72 (Irannejad and von Zastrow, 2014). However, it was later appreciated that GPCRs can activate G protein- and  
73  $\beta$ -arrestin-mediated signaling pathways from both the plasma membrane and endosomes (Ferrandon et al.,  
74 2009; Irannejad et al., 2013; Kotowski et al., 2011), and other subcellular compartments, like the Golgi apparatus  
75 and endoplasmic reticulum (ER) (Mohammad Nezhady et al., 2020). Internalized GPCR signaling is an enticing  
76 therapeutic target with potential to broaden our ability to manipulate GPCR-mediated physiological processes  
77 and disease states (Jensen et al., 2017; Jimenez-Vargas et al., 2021; Thomsen et al., 2018). However, it is  
78 unclear to what extent subcellular signaling contributes to the overall biased signaling exhibited by GPCRs.

79 The physiologic significance of location bias is difficult to determine as most biased agonists are synthetic  
80 ligands. However, chemokine receptors (CKRs) represent a subfamily of GPCRs consisting of approximately 20  
81 receptors and 50 endogenous ligands that interact to regulate many cellular functions like chemotaxis,  
82 angiogenesis, and neuromodulation (Eiger et al., 2021). CKRs are promiscuous in that some receptors bind  
83 multiple ligands, and some ligands bind multiple receptors. For example, CXCR3 is a CKR with three  
84 endogenous ligands, CXCL9, CXCL10, and CXCL11, and is expressed primarily on effector T cells (Colvin et  
85 al., 2006; Colvin et al., 2004; Groom and Luster, 2011). CXCR3 signaling, like many other CKRs, is primarily  
86 mediated by both G $\alpha$ i- and  $\beta$ -arrestin-dependent pathways (Smith et al., 2017). Previous work has shown that  
87 CXCL11 is relatively  $\beta$ -arrestin biased compared to CXCL9 and CXCL10, and each chemokine demonstrates  
88 distinct abilities to promote receptor-mediated endocytosis (Colvin et al., 2004; Smith et al., 2017; Smith et al.,  
89 2018b).

90 With its biased signaling and internalization and central role in regulating T cell biology, we studied  
91 CXCR3 and its endogenous ligands to determine how ligand bias extends beyond the plasma membrane to the  
92 endosome, with implications for sustained, differential signaling at specific subcellular compartments. We  
93 demonstrate that the CXCR3 ligands activate G proteins and  $\beta$ -arrestins differently at the endosome compared  
94 to the plasma membrane. Furthermore, downstream signaling responses, like kinase activation and cellular  
95 transcription, are differentially regulated by the endogenous ligands in a manner dependent on receptor  
96 internalization. We determine that the chemokines differentially modulate transcriptional pathways related to  
97 inflammation in primary CD8<sup>+</sup> T cells, and demonstrate that internalization is required to fully potentiate the  
98 inflammatory response in a mouse model of contact hypersensitivity. We demonstrate how biased GPCR  
99 signaling can change as the receptor traffics to a subcellular compartment with important physiological effects,  
100 and also highlight how a significant proportion of GPCR functional selectivity is dependent on sustained signaling  
101 following receptor internalization.

## 103 RESULTS

### 104 CXCR3 chemokines promote different amounts of $\beta$ -arrestin-dependent receptor internalization

105 We first determined if the biased chemokines of CXCR3 promoted different amounts of receptor-  
106 mediated internalization in HEK293 cells. Using bioluminescence resonance energy transfer (BRET), we

monitored a luciferase-tagged CXCR3 as it traffics to endosomes with an FYVE domain-tagged mVenus, or away from the plasma membrane using a Myrpalm-tagged mVenus. Consistent with previous studies, the chemokines promoted different degrees of receptor-mediated endocytosis with CXCL11 being the most efficacious ligand (**Figure 1A**) (Colvin et al., 2004; Meiser et al., 2008).  $\beta$ -arrestins are known to interact with a variety of effector proteins, including those involved in endocytosis (Claing et al., 2001; Goodman et al., 1996; Laporte et al., 1999; Lefkowitz and Shenoy, 2005; McDonald et al., 1999). To determine the role  $\beta$ -arrestins play in receptor internalization at CXCR3, we studied CXCR3 internalization in  $\beta$ -arrestin 1/2 CRISPR KO cells (Alvarez-Curto et al., 2016; Luttrell et al., 2018). Internalization was abrogated in the absence of  $\beta$ -arrestin 1 and 2 and reintroduction of  $\beta$ -arrestin 1 and/or  $\beta$ -arrestin 2 rescued CXCR3 internalization following stimulation with CXCL10 and CXCL11, but not CXCL9 (**Figure 1B**). Using confocal microscopy, we similarly observed an increase in receptor internalization upon rescue with  $\beta$ -arrestin 1 or  $\beta$ -arrestin 2 following stimulation with CXCL10 and CXCL11 (**Figure 1C**). Together, these data demonstrate that the CXCL10 and CXCL11 promote CXCR3 internalization in a  $\beta$ -arrestin-dependent manner.

### **Biased G protein activation depends on receptor location**

To determine how CXCR3 activates G proteins at the plasma membrane and endosomes, we used a location specific BRET biosensor to detect GTP-bound G $\alpha$ i as a measure of G protein activation (Johnston et al., 2008; Maziarz et al., 2020b) (**Figure 2A and 2B**). At the plasma membrane, CXCL11 promoted the most G protein activation followed by CXCL10 and lastly CXCL9 (**Figure 2C**), consistent with previous reports (Berchiche and Sakmar, 2016; Smith et al., 2017). All CXCR3 endogenous ligands promoted G protein activation at the endosome (**Figure 2D**). The amount of G protein activation was different than that observed at the plasma membrane; specifically, CXCL10 and CXCL11 had nearly identical G protein activation at the endosome but different amounts at the plasma membrane. Furthermore, CXCL11-induced G protein activation decreased in the endosome compared to the plasma membrane, while those of CXCL9 and CXCL10 did not change (**Figure 2E-G**), demonstrating that the impact of receptor location on G protein signaling is ligand-specific.

G $\alpha$ i family members are myristoylated, which localizes these proteins to the plasma membrane (Oldham and Hamm, 2008). We then tested if the relative change in endosomal G protein activation could be explained by different amounts of *total* G protein present in the endosomes. To do this, we developed a split nanoluciferase

135 assay to determine the *absolute* amount of Gai present in endosomes, irrespective of Gai nucleotide status  
136 **(Figure 2H)**. We found that Gai rapidly translocated to the endosome following stimulation with the CXCR3  
137 ligands, and the total amount of endosomal G protein mirrored a chemokine's ability to induce receptor  
138 internalization **(Figure 2I and 2J)**. Therefore, although similar amounts of endosomal G protein activation were  
139 observed following treatment with CXCL10 and CXCL11, when considering the absolute amount of endosomal  
140 G protein, CXCL11 promoted relatively *less* G protein activation than CXCL10. These data demonstrate location  
141 bias in G protein activation, with different levels of G protein activation at the plasma membrane compared to  
142 the endosome depending on the agonist.

### 144 **CXCR3-mediated cAMP inhibition is differentially dependent on receptor internalization**

145 We next studied the effect of inhibiting endocytosis on the intracellular accumulation of cAMP. While Gas  
146 family members activate adenylyl cyclase (AC) to produce cAMP, Gai family members inhibit AC. We utilized an  
147 exchange protein activated by cAMP (EPAC)-based BRET biosensor for cAMP that is ubiquitously expressed in  
148 cells (Masuho et al., 2015) **(Figure 3A)**. Prior to activation of the endogenous G $\alpha$ s-coupled  $\beta$ 2-adrenergic  
149 receptor ( $\beta$ 2AR), HEK293 cells were preincubated with the CXCR3 ligands, allowing us to measure Gai activity  
150 **(Figure 3A)**. To inhibit receptor-mediated internalization, we overexpressed a dominant-negative mutant of the  
151 GTPase Dynamin (Dynamin K44A), which is required for release of clathrin-coated vesicles from the plasma  
152 membrane (Damke et al., 1994). Using confocal microscopy, we confirmed that Dynamin K44A inhibited the  
153 translocation of membrane-bound CXCR3-GFP: $\beta$ -arrestin 2-RFP complexes into endosomes **(Supplemental**  
154 **Figure 1A)**.

155 Chemokine inhibition of cAMP production mirrored Gai nucleotide exchange, where CXCL11 and  
156 CXCL10 are significantly more potent and efficacious agonists than CXCL9 **(Figure 3B)**. Expression of Dynamin  
157 K44A reduced inhibition of cAMP production following stimulation with CXCL10 and CXCL11, but not CXCL9,  
158 reflecting a biased decrease in Gai-coupled activity **(Figure 3C)**. CXCL10 and CXCL11 both demonstrated a  
159 ~40% decrease in cAMP inhibition when receptor internalization was inhibited, even though the chemokines  
160 were able to promote different amounts of total receptor internalization **(Figure 3D-3I)**. cAMP gradients can exist  
161 in micro or nanodomains within the cell, and endosomal cAMP production can be critical for nuclear translocation  
162 of effectors like PKA (Calebiro and Maiellaro, 2014; Musheshe et al., 2018; Peng et al., 2021). Using an EPAC



163 BRET biosensor localized to the nucleus, we found that the pattern of cAMP inhibition was nearly identical to  
164 that measured globally (**Supplemental Figure 1B-1J**). These data demonstrate that receptor internalization is  
165 critical to the biased regulation of second messengers across subcellular compartments.

## 166 167 **Biased ligands of CXCR3 promote differential patterns of $\beta$ -arrestin 2 recruitment and conformation at** 168 **the plasma membrane and the endosome**

169 We next determined if the location-dependent functional selectivity observed in G protein signaling  
170 extended to  $\beta$ -arrestins. Consistent with previous studies, CXCL11 induced the most  $\beta$ -arrestin 2 recruitment to  
171 the plasma membrane, followed by CXCL10 and CXCL9 (**Figure 4A and 4B**) (Smith et al., 2017). While CXCL11  
172 promoted robust and sustained  $\beta$ -arrestin 2 recruitment to endosomes, CXCL10 only weakly and transiently  
173 recruited  $\beta$ -arrestin 2, while CXCL9 showed no detectable endosomal recruitment (**Figure 4C-4D**). GPCR affinity  
174 for  $\beta$ -arrestins can be classified as “Class A” GPCRs, which form transient complexes with  $\beta$ -arrestins, while  
175 “Class B” GPCRs form tight and long-lived complexes with  $\beta$ -arrestins (Jean-Charles et al., 2017; Oakley et al.,  
176 2000). CXCL9 and CXCL10 promote CXCR3 to behave like a “Class A” GPCR while CXCL11 promotes “Class  
177 B” behavior, a phenomenon previously described at other GPCRs (Janetzko et al., 2021; Rajagopal et al., 2013).

178 Recent research demonstrated that distinct conformations of  $\beta$ -arrestin mediate specific signaling events  
179 like GPCR desensitization, internalization, and effector scaffolding (Cahill et al., 2017; Coffa et al., 2011; Eichel  
180 et al., 2018; Latorraca et al., 2018). We developed an assay to quantify  $\beta$ -arrestin 2 conformation at specific  
181 cellular locations based on a previously described intramolecular fluorescent arsenical hairpin (FIAsH) BRET  
182 assay (Lee et al., 2016). This modified “complex FIAsH” assay takes advantage of a split nanoluciferase-coupled  
183 with FIAsH BRET (**Figure 4E and 4H**), and provides a readout of  $\beta$ -arrestin 2 conformation at specific subcellular  
184 locations. We assessed the conformational status of  $\beta$ -arrestin 2 using two previously validated FIAsH  
185 constructs, FIAsH 4 and FIAsH 5, which demonstrate preserved  $\beta$ -arrestin recruitment to GPCRs (Lee et al.,  
186 2016).  $\beta$ -arrestin activation is associated with a  $\sim 20^\circ$  rotation between its N- and C-domains (Shukla et al., 2013).  
187 Given the common location of the BRET acceptor on the  $\beta$ -arrestin 2 C-domain in the FIAsH 4 and FIAsH 5  
188 constructs, these sensors serve as readouts of  $\beta$ -arrestin interdomain twist (Chen et al., 2018). We found that  
189 the biased ligands of CXCR3 display markedly distinct patterns of FIAsH conformational signatures at both the  
190 plasma membrane and the endosome, suggesting that bias in  $\beta$ -arrestin 2 conformation is different at specific

191 subcellular locations (**Figure 4F-4G and 4I-4J**). While CXCL9 and CXCL10 recruited  $\beta$ -arrestin 2 to the plasma  
192 membrane, both chemokines did not induce significant change in  $\beta$ -arrestin 2 conformation at this location.  
193 CXCL11-induced distinct FIAsH signatures from CXCL9 and CXCL10 at the plasma membrane (**Figure 4F-4G**).  
194 At the endosome, CXCL10 and CXCL11 induced significant but different changes in  $\beta$ -arrestin 2 conformation  
195 while CXCL9 demonstrated no change in conformation, consistent with its inability to recruit  $\beta$ -arrestin 2 to  
196 endosomes (**Figure 4I-4J**). While the  $\beta$ -arrestin 2 conformation demonstrated an increase in BRET signal at the  
197 plasma membrane, we observed a decrease in BRET signal at the endosome, suggesting that  $\beta$ -arrestin 2  
198 adopts a different conformation at the endosome compared to the plasma membrane. Not only do the  
199 chemokines differentially recruit  $\beta$ -arrestin 2 to the plasma membrane and the endosome, but the conformation  
200 of  $\beta$ -arrestin 2 is uniquely dependent on both agonist and location, consistent with location bias in  $\beta$ -arrestin  
201 activity between agonists.

### 203 **Biased signaling profiles of the chemokines changes as the receptor traffics to endosomes**

204 Biased agonism at GPCRs is commonly assessed in terms of the relative activation between G proteins  
205 and  $\beta$ -arrestins, and we summarized the above findings using bias plots (**Figure 4K-4L**) (Gregory et al., 2010;  
206 Rajagopal et al., 2011). Bias plots allow for simultaneous assessment of relative activity between two assays,  
207 and the best fit lines obtained for each chemokine can assess relative bias across the ligands. At the plasma  
208 membrane we observed that CXCL11 is slightly  $\beta$ -arrestin-biased compared to CXCL10. CXCL9 demonstrated  
209 a similar profile to CXCL11, but with partial agonist activity. At the endosome, CXCL11 demonstrated a relative  
210 decrease in G protein activation while still effectively coupling to  $\beta$ -arrestin. Conversely, CXCL9 and CXCL10  
211 demonstrated a significant increase in relative G protein activation and simultaneous decrease in coupling to  $\beta$ -  
212 arrestin. Together, the relative  $\beta$ -arrestin-biased nature of CXCL11 and the G protein-biased nature of CXCL10  
213 at the plasma membrane were increased in the endosome. CXCL9 acts as a partial  $\beta$ -arrestin biased agonist at  
214 the plasma membrane, but becomes significantly more G protein-biased in the endosome (**Supplemental**  
215 **Figure 2**).

### 217 **CXCR3 signaling from endosomes differentially contributes to cytoplasmic and nuclear ERK activation**

We next investigated the activation of the mitogen-activated protein kinase (MAPK) pathway through ERK 1/2 phosphorylation (pERK), a common GPCR signaling pathway (Grundmann et al., 2018; Luttrell et al., 2018). Using Western blotting of pERK from whole cell lysates, we observed significant increases in pERK by CXCL10 and CXCL11, and relatively less activation by CXCL9 at 5 minutes (**Figure 5A**). Upon expression of Dynamin K44A, CXCL9-induced pERK was unchanged, while CXCL10 and CXCL11 demonstrated reduced pERK levels; however, this effect was not statistically significant (**Figure 5B**). Similar findings across the chemokines were observed at 30 minutes, and pERK levels declined back to baseline at 60 minutes (**Supplemental Figure 3A**).

To more accurately assess ERK 1/2 activation in different subcellular locations, we generated a BRET-based biosensor of the previously developed extracellular signal-regulated kinase activity reporter (EKAR) biosensor which reports on ERK kinase activity (Harvey et al., 2008) (**Supplemental Figure 3B**). This biosensor can be localized to the nucleus or cytoplasm to allow for detection of ERK activity in different subcellular compartments (**Supplemental Figure 3C and 3D**). Consistent with our immunoblots, we observed biased activation of cytoplasmic ERK by the chemokines (**Figure 5C-5E**). Dynamin K44A partially abrogated cytoplasmic ERK activity at CXCL10 and CXCL11, but not CXCL9 (**Figure 5F**). In contrast, we detected no measurable nuclear ERK activity with CXCL9 treatment, but substantial nuclear ERK activity with CXCL10 and CXCL11. Dynamin K44A expression led to near complete abrogation of nuclear ERK activity by both CXCL10 and CXCL11 (**Figure 5G-5J**). These findings suggest that CXCR3 internalization is necessary for activation of nuclear ERK, while CXCR3 internalization contributes to, but is not required for, cytoplasmic ERK activation. Furthermore, while CXCL9 promotes cytoplasmic ERK activity, it does not promote measurable nuclear ERK activation.

### **Biased agonists are differentially dependent on internalization for transcriptional regulation**

Previous studies have shown that certain transcriptional responses are dependent on sustained GPCR signaling from endosomes (Tsvetanova et al., 2015; Tsvetanova and von Zastrow, 2014). Notably, CXCL9, CXCL10, and CXCL11 have also previously been shown to differentially activate transcriptional reporters (Smith et al., 2017). To determine the contribution of CXCR3 signaling from endosomes to the transcriptional response, we studied the chemokine-induced activation of two transcriptional reporters, the serum response element

(SRE), which responds to ternary complex factor (TCF)-dependent MAPK/ERK signaling, and serum response factor response element (SRF-RE), which is a mutant form of SRE that responds to TCF-independent signaling pathways like RhoA (Hill et al., 1995). Consistent with previous work, CXCL11 promoted the most transcriptional activity at both reporters, followed by CXCL10 and CXCL9 in HEK293 cells (**Figure 6A and 6C**). Overexpression of Dynamin K44A significantly decreased CXCL11-mediated transcriptional activity, but had no significant effect on CXCL9- and CXCL10-mediated transcriptional activity. Inhibition of endocytosis led to a 50% decrease in CXCL11-induced transcriptional activation, which was significantly greater than that observed at CXCL9 and CXCL10 (**Figure 6B and 6D**). Interestingly, although CXCL10 promoted nuclear ERK activation in an endocytosis-dependent manner, inhibition of endocytosis did not impact CXCL10 activation of SRE to the same extent as CXCL11. These data suggest that CXCL10 and CXCL11 regulate transcriptional activation of this promoter element through different mechanisms, where CXCL11 demonstrates greater relative dependence on receptor internalization. Importantly, inhibition of endocytosis significantly decreased the degree of bias observed between the chemokines, demonstrating the critical role internalization plays in GPCR functional selectivity.

### **Chemokine-induced transcriptional responses in CD8+ T cells reveal differential activation of inflammatory pathways**

CXCR3 is primarily found in blood, bone marrow, and lymphoid tissues, specifically on Th1-type CD4+ T cells and effector CD8+ T cells (Groom and Luster, 2011). To study the biased transcriptional regulation at CXCR3 in a more physiologically relevant cell type, the transcriptional response of primary, activated, CD8+ human T-cells expressing endogenous amounts of CXCR3 stimulated with the chemokines was characterized by RNA Sequencing (RNA-Seq) (**Supplemental Figure 4A and 4B**). We observed significant changes in global transcriptional activation, detecting approximately 48000 transcripts, 887 of which varied by chemokine treatment (**Figure 4E**). There was a high degree of replicability between biological replicates (**Supplemental Figures 4C-4F**). The majority of differentially expressed genes (DEGs) increased in transcript level following chemokine treatment (**Supplemental Figure 4G-4K**). CXCL11 demonstrated the largest number of DEGs, consistent with our data in HEK293 cells (**Figure 6F**). Importantly, CXCL10 and CXCL11 demonstrate transcriptional profiles where the majority of DEGs were only found following treatment with each specific chemokine, rather than being shared across chemokines. These data contrast with that observed at CXCL9 – although it promoted significant

transcriptional activation, approximately 66% of CXCL9-induced DEGs were shared with CXCL10 and or CXCL11 (**Figure 6F**).

We next analyzed the DEGs by Gene Set Enrichment Analysis (GSEA) using the Molecular Signatures Database (mSigDB) (Subramanian et al., 2005). GSEA identified differentially activated biological pathways and processes corresponding to predefined mSigDB gene sets. Compared to vehicle control, the chemokines induce biased activation of pathways including interleukin JAK/STAT signaling, Myc targets, and TNF- $\alpha$ /NF- $\kappa$ B, among others. Comparison of DEGs between chemokines revealed differential activation of 8 gene sets between CXCL9 and CXCL10, 24 between CXCL9 and CXCL11, and 11 gene sets between CXCL10 and CXCL11 (**Figure 6G-6I**). Among them, several were proinflammatory including TNF- $\alpha$ /NF- $\kappa$ B, IL6/JAK/STAT3, MYC, mTORC1, and IFN $\gamma$  related pathways. CXCL11 was enriched in pathways related to the transcription factor MYC and apoptosis, suggesting that CXCL11 plays a role in regulating T-cell growth (Schmidt, 1999). In contrast, CXCL10 shows enrichment in cytokine related pathways (JAK/STAT, IFN $\gamma$ ), complement, and inflammatory responses, suggesting that CXCL10 may promote a pro-inflammatory T-cell phenotype. These findings highlight the lack of conserved transcriptional response across the chemokines, demonstrating the physiologic role of sustained signaling from endosomes in biased regulation of inflammatory pathways.

### **CXCR3 internalization contributes to potentiation of inflammation in a murine model of contact hypersensitivity**

We previously showed in a murine model of allergic contact hypersensitivity (CHS) that a synthetic  $\beta$ -arrestin-biased CXCR3 agonist, VUF10661, potentiates inflammation through increased recruitment of CD8+ T cells in a  $\beta$ -arrestin 2-dependent manner (Smith et al., 2018b). To determine if this response requires sustained CXCR3 signaling from endosomes, we inhibited receptor-mediated internalization in this CHS model. Following sensitization, CHS was elicited through application of the allergen dinitrofluorobenzene (DNFB) or vehicle control to the ears of the mice with concomitant administration of VUF10661 and a pharmacologic inhibitor of Dynamin, Dyngo 4a (Eichel et al., 2016; Jensen et al., 2017; McCluskey et al., 2013). Ear thickness was measured as a marker of inflammation (**Figure 7A**). Previous work showed that VUF10661 in the absence of DNFB does not illicit an inflammatory response (Smith et al., 2018b) and we observed similar findings with Dyngo 4a

301 **(Supplemental Figure 5)**. Therefore, any increase in ear thickness was primarily due to modulated DNFB-  
302 induced inflammation, and not directly from the compounds tested.

303 Following DNFB sensitization and treatment, mice treated with VUF10661 demonstrated a 60% increase  
304 in ear thickness over control **(Figure 7C)**. This effect was decreased in mice that received concomitant  
305 administration of Dyngo 4a and VUF10661 compared to control, with only a 20% increase in ear thickness.  
306 These results are consistent with the conclusion that sustained CXCR3 signaling from endosomes is required  
307 for maximal potentiation of the inflammatory response. Together, these data demonstrate the *in vivo* role of  
308 subcellular GPCR signaling in modulating inflammation.

## 309 310 **DISCUSSION**

311 Our findings are synthesized in a working model of how location bias by CXCR3 chemokine agonists  
312 promote functionally selective responses with distinct effects on inflammation **(Figure 7C)**. At the plasma  
313 membrane, the chemokines demonstrate biased engagement of G proteins and  $\beta$ -arrestins leading to different  
314 amounts of  $\beta$ -arrestin-dependent receptor-mediated endocytosis. In the endosomes, we observed relative  
315 changes in signaling across all chemokines, where CXCL11 became more  $\beta$ -arrestin-biased while CXCL9 and  
316 CXCL10 demonstrated enhanced coupling to G proteins. CXCR3 signaling from the plasma membrane and  
317 endosome both contributed to the cytosolic activation of ERK1/2; however, only CXCL10 and CXCL11 activated  
318 nuclear ERK1/2 in a manner almost entirely dependent on signaling from endosomes. This functionally selective  
319 and location-dependent signaling converged to differentially regulate transcription in both HEK293 cells and  
320 primary CD8<sup>+</sup> T cells, with differential effects on genes that play important roles in inflammation. Lastly, we found  
321 that inhibiting endocytosis in a CXCR3-mediated CHS model in mice significantly decreased inflammation.  
322 Together these findings suggest a physiologically important role for location bias in CXCR3 signaling that  
323 contributes to the inflammatory response.

324 It was previously believed that ligand:receptor interactions in the CKR family were redundant (Mantovani,  
325 1999). Considerable evidence has challenged this notion and demonstrated that a significant proportion of CKR  
326 signaling is indeed specific to particular ligand:receptor combinations (Corbisier et al., 2015; Mikucki et al., 2015;  
327 Rabin et al., 1999; Rajagopal et al., 2013). Here we show that the functional selectivity observed at CKRs persists  
328 beyond the plasma membrane into subcellular compartments like the endosome. Additionally, location bias is



critical for some, but not all, ligands, to their functional selectivity. Given that GPCRs are known to translocate to locations like the Golgi apparatus, it is possible that trafficking to other cellular compartments may demonstrate signaling patterns different than those observed in this study (Eichel and von Zastrow, 2018; Mohammad Nezhady et al., 2020; Pavlos and Friedman, 2017). Additionally, some GPCRs simultaneously exist on multiple membrane bound structures, like the nucleus and mitochondria (Mohammad Nezhady *et al.*, 2020), enabling for even greater signaling diversity for membrane permeable ligands.

While all of the chemokines couple CXCR3 to  $\beta$ -arrestin 2 at the plasma membrane, only CXCL10 and CXCL11 were able to translocate  $\beta$ -arrestin to endosomes, albeit to different extents. The biased chemokines also promoted unique  $\beta$ -arrestin conformations at the plasma membrane which persisted as the receptor trafficked to the endosome. Because  $\beta$ -arrestin conformation is directly related to function, it is likely these conformational differences contribute to biased receptor signaling (Lee *et al.*, 2016).  $\beta$ -arrestin can engage the GPCR core (core conformation) which is associated with G protein desensitization; however, it can also bind to the GPCR C-terminal tail (tail conformation), which is associated with receptor internalization and effector scaffolding (Cahill *et al.*, 2017; Kumari et al., 2016). There is also evidence of GPCR:G protein: $\beta$ -arrestin “megaplexes” which allow for sustained G protein signaling, with simultaneous engagement of  $\beta$ -arrestin in the tail conformation (Nguyen et al., 2019; Thomsen et al., 2016). We observed a relative decrease in G protein signaling in endosomes following treatment with CXCL11 but not with CXCL10. It is possible that CXCL10 promotes  $\beta$ -arrestin to adopt a tail conformation that drives receptor internalization without further desensitization of G protein signaling. Although CXCL11 promotes greater amounts of total endosomal  $\beta$ -arrestin, it is possible that a relatively larger proportion of this  $\beta$ -arrestin adopts a core conformation.

Our assessments of downstream signaling demonstrate the functional diversity that can be obtained through a single GPCR using biased agonists. Biased MAPK activation observed across the CXCR3 chemokines was dependent on subcellular location. We observed significant differences in transcriptional activation that directly correspond with the ability of a ligand to activate ERK, consistent with prior studies (Whitmarsh et al., 1995). Although overexpression of Dynamin K44A eliminated nuclear ERK activation at CXCL10 and CXCL11, we only observed a significant decrease in transcriptional activity with CXCL11 treatment. It is possible that CXCL10 and CXCL11 activate certain promoter elements through different mechanisms. This is consistent with

356 recent reports demonstrating that some membrane bound GPCRs can activate MAPKs via multiple mechanism,  
357 such as translocation of G $\beta$  $\gamma$  proteins to the Golgi apparatus (Khater et al., 2021).

358 Our findings highlight the critical role of ligand bias and location bias in GPCR signaling, which were  
359 further demonstrated in the diverse transcriptional responses observed in primary CD8+ T cells and a murine  
360 model of CHS. Previous work at the Neurokinin 1 receptor (NK<sub>1</sub>R) showed that signaling from endosomes was  
361 critical for prolonged nociception (Jensen et al., 2017). A NK<sub>1</sub>R antagonist which trafficked with the receptor to  
362 endosomes demonstrated sustained GPCR antagonism and heightened antinociception, revealing the clinical  
363 utility of GPCR targeted therapeutics that function at multiple cellular locations (Jensen et al., 2017). We found  
364 that GPCRs can adopt multiple different signaling profiles and trafficking patterns, simply by changing the ligand  
365 used to activate the receptor. We demonstrated the potential utility of developing pharmaceutical drugs that not  
366 only activate the receptor in a biased fashion, but also target the receptor to one or multiple subcellular  
367 compartments. Given that our work was conducted at CXCR3, it is important to understand how temporospatial  
368 functional selectivity contributes to disease pathologies at other CKRs and GPCRs in order to develop more  
369 targeted, efficacious, and safer therapeutics. Because biased agonism has recently been observed at other  
370 receptor superfamilies like receptor tyrosine kinases (Karl et al., 2020), this work has important implications in  
371 harnessing the functional selectivity of chemokine receptors, GPCRs, and other transmembrane receptors at  
372 and beyond the plasma membrane.



474 **ACKNOWLEDGEMENTS**

475 We thank R.J. Lefkowitz (Duke University, USA) for guidance, mentorship, and thoughtful feedback throughout  
476 this work; N. Nazo for laboratory assistance. Funding: This work was supported by T32GM007171 (D.S.E.), the  
477 Duke Medical Scientist Training Program (D.S.E.), AHA 20PRE35120592 (D.S.E.), 1R01GM122798 (S.R.),  
478 K08HL114643 (S.R.), Burroughs Wellcome Career Award for Medical Scientists (S.R.), Duke University Dean's  
479 Summer Research Fellowship (N.B., C.C.H).

481 **AUTHOR CONTRIBUTIONS**

482 Conceptualization, D.S.E., S.R.; Methodology, D.S.E., S.R.; Investigation, D.S.E., N.B., C.C.H., J.G., S.K., C.H.,  
483 I.C., U.P., K.Z., A.W.; Writing - Original Draft, D.S.E., N.B., C.C.H., J.G., C.H., K.Z., A.W.; Writing - Reviewing &  
484 Editing, D.S.E., N.B., C.C.H., J.G., S.K., J.S.S, J.Z., and S.R.; Visualization, D.S.E and S.R.; Supervision and  
485 Funding Acquisition, J.Z. and S.R.

487 **DECLARATION OF INTERESTS**

488 The authors declare no competing interests.

490 **INCLUSION AND DIVERSITY**

491 One or more of the authors of this paper self-identifies as an underrepresented ethnic minority in science.  
492 While citing references scientifically relevant for this work, we also actively worked to promote gender balance  
493 in our references list.

494 **MAIN FIGURE TITLES AND LEGENDS**

495  
496 **Figure 1: CXCR3 receptor-mediated internalization is differentially regulated by biased chemokines and**  
497 **dependent on  $\beta$ -arrestin. (A)** CXCR3 trafficking to early endosomes using the BRET acceptor 2x-Fyve-mVenus  
498 or away from the plasma membrane using Myrpalm-mVenus in HEK293 cells. **(B)** CXCR3 trafficking away from  
499 the plasma membrane using Myrpalm-mVenus in  $\beta$ -arrestin 1/2 knock out cells. Data are normalized to maximum  
500 signal and are the mean  $\pm$  SEM, n=4. \*P < .05 by one-way or two-way ANOVA. For **(A)**, post-hoc testing was  
501 conducted between ligands within each BRET acceptor and for **(B)** post-hoc testing was conducted between  
502 pcDNA 3.1 and every other transfection condition within a ligand. **(C)** Confocal microscopy images of  $\beta$ -arrestin  
503 1/2 knock out cells transfected with CXCR3-mCerulean and either pcDNA 3.1,  $\beta$ -arrestin 1, or  $\beta$ -arrestin 2  
504 following the listed treatment for 45 minutes. Images are representative of three replicates.

505  
506 **Figure 2: CXCR3 G protein signaling changes as the receptor traffics away from the plasma membrane**  
507 **to the endosome.** Schematic representation of the location-specific BRET-based GTP-Gai sensor. Following G  
508 protein activation, the GTP bound Gai-mVenus will interact with the peptide KB-1753-NLuc, which selectively  
509 binds GTP-bound Gai 1-3, to produce a BRET signal. The peptide is localized to the **(A)** plasma membrane or  
510 the **(B)** endosome. Agonist dose-dependent formation of GTP-Gai at the **(C)** plasma membrane or **(D)** endosome  
511 in HEK293 cells. **(E-G)** Data for each ligand at the plasma membrane and endosome are presented according  
512 to ligand identity. Data for figures **(C-G)** are normalized to CXCL11-induced GTP-Gai at the plasma membrane.  
513 **(H)** Schematic representation of the split nanoluciferase assay detecting total endosomal Gai irrespective of Gai  
514 nucleotide status. **(I)** Agonist dose-dependent and **(J)** kinetic data of Gai-LgBit recruitment to endosomes tagged  
515 with 2xFyve-SmBit. Data are the mean  $\pm$  SEM, n=3-6. \* denotes statistically significant differences between  $E_{max}$   
516 of ligands.

517  
518 **Figure 3: Maximal Gai mediated cAMP inhibition at CXCR3 is dependent on receptor endocytosis. (A)**  
519 Schematic representation of the cAMP sensor experimental design (Masuho *et al.*, 2015). Agonist dose-  
520 dependent inhibition of isoproterenol-induced cAMP production by the chemokines in HEK293 cells with  
521 concurrent transfection of **(B)** pcDNA 3.1 or **(C)** Dynamin K44A to inhibit internalization. **(D to F)** Kinetic data

522 and **(G to I)** agonist dose-dependent of cAMP inhibition levels in HEK293 cells treated with CXCL9, CXCL10  
523 and CXCL11, respectively. Data are the mean  $\pm$  SEM, n=5. \* denotes statistically significant differences between  
524  $E_{max}$  for dose response data of pcDNA 3.1 versus Dynamin K44A transfection conditions at each ligand. See  
525 Figure S1 for similar data on nuclear cAMP.

526  
527 **Figure 4: CXCR3 demonstrates biased  $\beta$ -arrestin 2 recruitment and conformation between chemokine**  
528 **agonists at the plasma membrane and endosome.** Kinetic data and quantification of area-under-the-curve  
529 (AUC) of  $\beta$ -arrestin-2 recruitment to the **(A and B)** plasma membrane or **(C and D)** endosome following 100nM  
530 chemokine stimulation of CXCR3. **(E)** Schematic of complex FIAsh assay to detect  $\beta$ -arrestin 2 conformation.  
531 Cells express LgBit-CAAX and a modified SmBit- $\beta$ -arrestin 2 complex FIAsh construct. Upon complex FIAsh  
532 recruitment to the plasma membrane, complementation between the LgBit and SmBit creates a functional  
533 nanoluciferase protein which can undergo BRET with the intramolecular tetracysteine motif. **(F and G)** Complex  
534 FIAsh 4 and 5 plasma membrane BRET data for CXCR3 treated with chemokines. **(H)** Schematic of complex  
535 FIAsh assay, similar to Figure 4E, to detect  $\beta$ -arrestin 2 conformation at the endosome, using 2x-Fyve-LgBit. **(I**  
536 **and J)** Complex FIAsh 4 and 5 endosomal BRET data for CXCR3 treated with chemokines. **(K and L)** Bias plots  
537 demonstrating relative G protein activation and  $\beta$ -arrestin 2 recruitment at the plasma membrane and endosome  
538 across the chemokines. Arrows highlight the change in best fit lines between CXCL10 and CXCL11. For  $\beta$ -  
539 arrestin 2 recruitment assays, data are the mean  $\pm$  SEM, n=3. \* denotes statistically significant differences  
540 between AUC between different chemokines. For complex FIAsh assays, data are the mean  $\pm$  SEM, n=3-5.  
541 \*P<.05 by one-way ANOVA with Tukey's post-hoc testing conducted between ligands within each FIAsh  
542 construct. #P<.05 by a one-sample t-test is listed beneath each chemokine to determine if the Net BRET value  
543 was non-zero. See also Figure S2.

544  
545 **Figure 5: CXCR3 internalization is required for biased cytoplasmic and nuclear ERK1/2 activation. (A)**  
546 Representative western blot and **(B)** quantification of ERK1/2 phosphorylation following 5 minutes of stimulation  
547 with vehicle control or chemokine with transfection of pcDNA 3.1 or Dynamin K44A. Data are the mean  $\pm$  SEM,  
548 n=5 and are normalized to CXCL11 and pcDNA 3.1. Kinetic data and quantification of AUC of ERK activity using  
549 the **(C-F)** cytoplasmic and **(G-J)** nuclear ERK BRET biosensors following chemokine treatment with transfection

of pcDNA 3.1 or Dynamin K44A. Data are the mean  $\pm$  SEM, n=3-4. \*P<.05 using a two-way ANOVA analysis with comparisons made between pcDNA 3.1 or Dynamin K44A within a ligand. See also Figure S3.

**Figure 6: Biased transcriptional regulation at CXCR3 is dependent on receptor trafficking to endosomes.**

Transcriptional activity of CXCR3-expressing HEK293 cells transfected with a **(A)** serum response element (SRE) or **(C)** serum response factor response element (SRF-RE) luciferase reporter and either pcDNA 3.1 or Dynamin K44A. Percent of **(B)** SRE or **(D)** SRF-RE signal retained when overexpressing Dynamin K44A. For luciferase reporter assays, data are the mean  $\pm$  SEM, n=4. \*P<.05 using a two-way ANOVA analysis with comparisons made between pcDNA 3.1 or Dynamin K44A within a ligand. A one-way ANOVA with Tukey's post-hoc testing was conducted for **(B)** and **(D)**. **(E)** Heat map of differentially expressed genes (DEGs) in primary CD8+ T-cells. **(F)** Venn diagram of DEGs compared to vehicle treatment. **(G-I)** Gene set enrichment analysis of differentially regulated pathways between chemokines. Listed pathways are statistically significant at P < .05, however, select pathways are labelled as TRUE if the False Discovery Rate (FDR) is < 0.25 and FALSE if the FDR is > 0.25. See also Figure S4 for additional informatics analysis of CXCR3 transcriptomics.

**Figure 7: Receptor internalization is required for maximum CXCR3-mediated inflammation. (A)**

Experimental design of the dinitrofluorobenzene (DNFB)-induced contact hypersensitivity mouse model. Mice are sensitized with DNFB on their back, followed by induction of inflammation with DNFB or vehicle control on the ears four days later. This is followed by treatment with VUF10661 with or without Dyngo 4a at 0, 24 hours, and 48 hours. **(B)** Ear thickness following DNFB elicitation and application of VUF10661 (50nM) with or without Dyngo 4a (50nM). Data are presented as the VUF10661-induced increase in ear thickness over control (DMSO or Dyngo 4a alone – see Figure S5 for changes in ear thickness associated with control treatments). Data are means  $\pm$  SEM of 7-10 mice per treatment group. \*P < .05 using a two-way ANOVA analysis. **(C)** Working model demonstrating how location bias contributes to functionally selective cellular signaling and inflammatory responses at CXCR3.

576 **STAR Methods**

577  
578 **RESOURCE AVAILABILITY**

579  
580 **Lead Contact**

581 Further information and requests for resources and reagents should be directed to and will be fulfilled by the  
582 lead contact, Sudarshan Rajagopal ([Sudarshan.rajagopal@duke.edu](mailto:Sudarshan.rajagopal@duke.edu)).

583  
584 **Materials Availability**

585 All plasmids generated in this study will be distributed upon request.

586  
587 **Data and Code Availability**

588 RNA-seq data have been deposited at GEO and are publicly available as of the date of publication. Accession  
589 numbers are listed in the key resources table. All data reported in this paper will be shared by the lead contact  
590 upon request.

591  
592 **EXPERIMENTAL MODEL AND SUBJECT DETAILS**

593  
594 **Bacterial strains**

595 XL-10 Gold ultracompetent *E. coli* (Agilent) were used to express all constructs used in this manuscript.

596  
597 **Cell Lines**

598 Human Embryonic Kidney (HEK293,  $\beta$ -arrestin 1/2 knockout) cells were grown in minimum essential media  
599 (MEM) supplemented with 10% fetal bovine serum (FBS) and 1% penicillin/streptomycin at 37°C and 5% CO<sub>2</sub>.  
600  $\beta$ -arrestin 1/2 CRISPR/Cas9 KO HEK293 cells were provided by Asuka Inoue and validated as previously  
601 described (Alvarez-Curto *et al.*, 2016). CD8<sup>+</sup> T cells were cultured in RPMI 1640 supplemented with 10% FBS  
602 and 1% penicillin/streptomycin at 37°C and 5% CO<sub>2</sub>.

603

## 604 **Animal Studies**

605 All animal procedures performed in this study were in agreement with the Guide for the Care and Use of  
606 Laboratory Animals of the National Institutes of Health. Animals were housed in Duke University's GSRBII and  
607 protocols for use were approved by Duke University's Institutional Animal Care and Use Committee. All animals  
608 were housed under the Duke University protocol number A104-20-05. Female WT C57BL/6 (Charles River) mice  
609 were bred and maintained under specific pathogen-free conditions in accredited animal facilities at the Duke  
610 University under the animal protocol. Because the ear inflammation in this CHS model causes mice to scratch  
611 and gnaw at their ears, excessive scratching can produce artificially large increases in ear thickness. To minimize  
612 this phenomenon, female mice were chosen as they tend to be less aggressive than male mice and can  
613 additionally be socially housed (Jirkof et al., 2020; Olsson and Westlund, 2007).

## 615 **METHOD DETAILS**

### 617 **Generation of Constructs**

618 Construct cloning was performed using conventional techniques such as restriction enzyme/ligation methods.  
619 Linkers between the fluorescent proteins or luciferases and the cDNAs for receptors, transducers, or other  
620 proteins were flexible and ranged between 2 and 18 amino acids. Dr. Kirill Martemyanov provided the EPAC  
621 plasmid which was used to clone the nuclear specific EPAC cAMP sensors. EKAR FRET ERK1/2 biosensors  
622 previously published (Harvey et al., 2008) were used to generate BRET versions of these sensors by removing  
623 the N-terminal mCerulean through restriction digest and inserting a nanoluciferase.

### 625 **Cell Culture and Transfection**

626 For BRET and luminescence-based assays, HEK293 cells were transiently transfected with an optimized calcium  
627 phosphate protocol as previously described unless otherwise indicated (Pack et al., 2018). In the calcium  
628 phosphate transfection method, cell culture media was replaced 30 minutes prior to transfection. Plasmid  
629 constructs were suspended in water to a final volume of 90 $\mu$ L. 10  $\mu$ L of 2.5 M calcium chloride was added to the  
630 plasmid constructs and mixed. 100  $\mu$ L of 2x HEPES-buffered saline solution (10mM D-Glucose, 40mM HEPES,

10 mM potassium chloride, 270 mM sodium chloride, 1.5 mM disodium hydrogen phosphate dihydrate) was added to the solution, allowed to incubate for two minutes, and subsequently added to the cells.

For BRET biosensors for compartmentalized ERK activity and cAMP levels, transcriptional reporter assays, and confocal microscopy, cells were transiently transfected using polyethylenimine (PEI). In the PEI transfection method, cell culture media was replaced 30 minutes prior to transfection. Plasmid constructs were suspended in Opti-MEM (GIBCO) to a final volume of 100  $\mu$ L and, in a separate tube, PEI at a concentration of 1 mg/mL was added to Opti-MEM to a final volume of 100  $\mu$ L. For experiments in this manuscript, 3  $\mu$ L of PEI was used per 1  $\mu$ g of plasmid DNA. After 5 minutes, the 100  $\mu$ L PEI solution was added to the 100  $\mu$ L DNA solution, gently mixed, and allowed to incubate at room temperature for 10-15 minutes, after which the mixture was added to the cells.

### **BRET and Split Luciferase Assays**

For all BRET and Split Luciferase assays, HEK293 cells seeded in 6 well plates were transiently transfected using the calcium phosphate method described previously unless otherwise indicated.

To determine G protein nucleotide status, we took advantage of and modified a previously described two component BRET sensor (Maziarz et al., 2020a). The first component of the biosensor consists of a plasma membrane targeting domain anchor, a synthetic peptide KB-1753 that selectively and reversibly binds to GTP-bound Gai (Gai 1-3) (Johnston et al., 2008), and a nanoluciferase BRET donor. By altering the identity of the lipid anchor, the sensor can be used to detect G protein activation at different cellular locations. Specifically, the GTP-bound Gai sensor located at the plasma membrane (Mas-KB1753-NLuc) has a myristic attachment sequence (mas) targeting sequence (MGSSKSKTSNS) (Maziarz et al., 2020a). We generated a GTP-bound Gai sensor with a 2x-Fyve targeting sequence from the hepatocyte growth factor-regulated tyrosine kinase substrate to target it to the endosome (2xFyve-KB1753-NLuc). When co-expressed with Gai-mVenus, the sensor will bind to the active Gai subunit following guanine nucleotide exchange of GDP for GTP and produce a BRET signal.

G protein localization to endosomes irrespective of nucleotide status was detected using wild-type CXCR3, Gai-LgBit, and 2xFyve-SmBit. The role of  $\beta$ -arrestin in receptor internalization was assessed using wild-type CXCR3 tagged with a C-terminal RLuc2, Myrpalm tagged mVenus or 2x-Fyve tagged mVenus, and rescue



659 of  $\beta$ -arrestin 1,  $\beta$ -arrestin 2, both  $\beta$ -arrestin isoforms, or pcDNA 3.1 control.  $\beta$ -arrestin recruitment was assessed  
660 using wild-type CXCR3, SmBit- $\beta$ -arrestin 2, and either 2xFyve-LgBit to detect  $\beta$ -arrestin 2 at endosomes or  
661 LgBit-CAAX to detect  $\beta$ -arrestin 2 at the plasma membrane.

662 Location-specific BRET-biosensors of downstream signaling (EPAC and EKAR) were transfected using  
663 PEI. The EPAC-based BRET biosensor (Masuho et al., 2015) consists of an N-terminal nanoluciferase and two  
664 C-terminal Venus constructs. Following production of cAMP by the endogenously expressed Gas-coupled  $\beta$ 2-  
665 adrenergic receptor ( $\beta$ 2AR), the BRET biosensor will bind cAMP and undergo a conformational change which  
666 leads to a decrease in BRET efficiency. The EKAR biosensor consists of a target substrate that, following  
667 phosphorylation by activated pERK, binds to a phosphorylation binding domain, causing a conformational  
668 change in the biosensor and subsequent change in BRET efficiency.

669 Twenty-four hours after transfection, cells were washed with phosphate buffered saline, collected with  
670 trypsin, and plated onto a clear bottom, white-walled, 96 well plate at 50,000-100,000 cells/well in clear minimum  
671 essential medium supplemented with 2% FBS, 1% penicillin/streptomycin, 10mM HEPES, 1x GlutaMax, and 1x  
672 Antibiotic-Antimycotic (Gibco). The next day, the media were removed, and cells were incubated at room  
673 temperature with 80  $\mu$ L of 3 $\mu$ M coelenterazine h in Hanks' balanced salt solution (HBSS) (Gibco) supplemented  
674 with 5mM HEPES for 5-10 minutes before adding ligand at the appropriate concentration. For BRET assays  
675 assessing CXCR3 internalization, HEK293 cells were stimulated with 100nM of each chemokine and the data  
676 shown are average Net BRET ratios calculated between 25 and 30 minutes following stimulation.

677 For EPAC assays, 100 nM chemokine and coelenterazine h were added simultaneously and allowed to  
678 incubate for 15 minutes prior to the addition of 1  $\mu$ M isoproterenol to promote cAMP formation. For split luciferase  
679 assays to assess G $\alpha$ i-Lgbit and SmBit- $\beta$ -arrestin 2 trafficking, as well as BRET EKAR and EPAC assays, three  
680 initial reads were taken prior to the addition of ligand to quantify baseline luminescence or BRET before adding  
681 ligand. Plates were read with a BioTek Synergy Neo2 plate reader set at 37°C. All readings were performed  
682 using a kinetic protocol.

683 BRET plates were read using a 480 nm wavelength filter and 530 nm wavelength filter. BRET ratios were  
684 calculated by dividing the 530 nm acceptor signal by the 480 nm donor signal. Net BRET ratios were calculated  
685 by subtracting the vehicle BRET ratio from the ligand stimulated BRET ratio. Split luciferase plates were read



686 without a wavelength specific filter. Baseline luminescence was subtracted from each read following ligand  
687 addition to calculate a change in luminescence after ligand stimulation and then normalized to vehicle treatment.

## 689 **Complex Intramolecular Fluorescent Arsenical Hairpin (FIAsH) BRET of $\beta$ -arrestin 2**

690 HEK293 cells seeded in six-well plates were transiently transfected with wild-type CXCR3, SmBit-tagged  
691 FIAsH 4 or 5, and either 2xFyve-LgBit or LgBit-CAAX using the calcium phosphate transfection protocol. In this  
692 complex FIAsH assay, CCPGCC tetracysteine sequences were inserted into a  $\beta$ -arrestin 2 construct following  
693 amino acids 225 in FIAsH 4 and 263 in FIAsH 5 (Lee et al., 2016). These tetracysteine motifs are capable of  
694 binding the organoarsenic compound FIAsH-EDT<sub>2</sub>. The original FIAsH constructs have an N-terminal luciferase  
695 which, in the complex FIAsH assay, is replaced with a SmBit (Lee et al., 2016). When the  $\beta$ -arrestin 2 complex  
696 FIAsH construct is recruited to one of the tagged intracellular locations, complementation occurs between the  
697 LgBit and SmBit, creating a functional nanoluciferase protein. The produced luminescent signal (~460nm) can  
698 undergo resonance energy transfer (RET) with the intramolecular FIAsH-EDT<sub>2</sub>, which serves as an acceptor  
699 moiety to produce a BRET signal (~530nm). The efficiency of RET depends on the distance and conformation  
700 between the split nanoluciferase and FIAsH-EDT<sub>2</sub>. Thus, this assay provides a readout of  $\beta$ -arrestin 2  
701 conformation as measured between the N-terminus and two different locations on the  $\beta$ -arrestin 2 C-domain at  
702 specific subcellular locations.

703 Twenty-four hours after transfection, cells were plated onto clear-bottomed, rat-tail collagen coated,  
704 white-walled, Costar 96-well plates at 100,000 cells/well in minimum essential medium (Gibco) supplemented  
705 with 10% fetal bovine serum and 1% penicillin-streptomycin (P/S). The following day, cells were washed with 50  
706  $\mu$ L of HBSS (Gibco). 100  $\mu$ L of 2.5  $\mu$ M FIAsH-EDT<sub>2</sub> in HBSS was added for arsenical labeling, and cells were  
707 incubated in the dark at 37°C for 45 minutes. FIAsH-EDT<sub>2</sub> was aspirated, and the cells were washed with 130  
708  $\mu$ L of 250  $\mu$ M 2,3 dimercaptopropanol (BAL) wash buffer. Cells were then incubated at room temperature with  
709 80  $\mu$ L of 3  $\mu$ M coelenterazine h in Hanks' balanced salt solution (Gibco) supplemented with 20mM HEPES for  
710 5-10 minutes. Following a 5-minute incubation in 37°C, three prereads were taken to measure baseline BRET  
711 ratios. Chemokine was then added to 100 nM final concentration. Plates were read with a BioTek Synergy Neo2  
712 using a 480 nm wavelength filter and 530 nm wavelength filter. Readings were performed using a kinetic protocol.  
713 BRET ratios were calculated by dividing the 530 nm signal by 480 nm signal. Net BRET values were calculated

714 as described above by averaging six consecutive BRET values and normalizing to vehicle control. Net BRET  
715 values of  $\beta$ -arrestin 2 conformation using the membrane tag LgBit-CAAX were calculated at 5 minutes following  
716 ligand stimulation, while Net BRET values using the endosome tag 2xFyve-LgBit were calculated at 20 minutes  
717 following ligand stimulation.

## 719 **Immunoblotting**

720 Immunoblotting was performed as described previously (Smith et al., 2018b). HEK293 cells seeded in 12 well  
721 plates were transiently transfected with wild-type CXCR3 and either pcDNA 3.1 or Dynamin K44A using the  
722 calcium phosphate transfection method. 24 hours after transfection, cells were serum starved in minimum  
723 essential medium supplemented with 0.01% bovine serum albumin (BSA) and 1% penicillin/streptomycin for 16  
724 hours. The cells were then stimulated with 100nM chemokine or vehicle control for 5, 30, or 60 minutes, washed  
725 with ice cold PBS, and lysed in ice cold RIPA buffer supplemented with phosphatase and protease inhibitors  
726 (Phos-STOP (Roche), cOmplete EDTA free (Sigma)). The samples were rotated at 4°C for forty-five minutes  
727 and cleared of insoluble debris by centrifugation at 17,000g at 4°C for 15 minutes, after which the supernatant  
728 was collected. Protein was resolved on SDS-10% polyacrylamide gels, transferred to nitrocellulose membranes,  
729 and immunoblotted with the indicated primary antibody overnight at 4°C. phospho-ERK (Cell Signaling  
730 Technology, #9106) and total ERK (Millipore Sigma, #06-182) antibodies were used to assess ERK activation.  
731 Horseradish peroxidase-conjugated anti-rabbit-IgG or anti-mouse-IgG were used as secondary antibodies. The  
732 nitrocellulose membranes were imaged by SuperSignal enhanced chemiluminescent substrate (Thermo Fisher)  
733 using a ChemiDoc MP Imaging System (Bio-Rad). Following detection of pERK signal, nitrocellulose membranes  
734 were stripped and reblotted for tERK signal. Relative ERK activation was calculated by dividing the intensity of  
735 pERK by tERK and comparing this ratio for a specific experimental condition to that of vehicle treatment.

## 737 **Transcriptional Reporter Assays – SRE and SRE-SF**

738 HEK293 cells seeded in 6 well plates were transiently transfected with SRE or SRF-RE reporter plasmids, wild  
739 type CXCR3, and either pcDNA 3.1 or Dynamin K44A using the PEI transfection method. Twenty-four hours  
740 after transfection, cells were washed with PBS, collected with trypsin, and plated onto a clear bottom, white-  
741 walled, 96 well plate at 50,000-100,000 cells/well and starved overnight in serum-free minimum-essential media

(Gibco) supplemented with 1% penicillin/streptomycin. The cells were then incubated with 100 nM CXCL9, CXCL10, or CXCL11 for six hours. The wells were aspirated and then incubated with 1.6mM luciferin in Hanks' balanced salt solution (Gibco) supplemented with 20mM HEPES for ten minutes. Luminescence was quantified at 480nm using a BioTek Synergy Neo2 plate reader set at 37°C. Transcriptional activity was quantified by calculating the fold-change in luminescence of ligand-treated cells from vehicle-treated cells. The fold-change was then normalized to maximum signal.

### **Confocal Microscopy**

HEK293 cells were plated on rat-tail-collagen-coated 35 mm glass bottomed dishes (MatTek Corporation, Ashland, MA) and transiently transfected using PEI with the listed constructs. Forty-eight hours following transfection, the cells were washed once with PBS and then serum starved for one hour. The cells were subsequently treated with a control of serum free media or the listed chemokine at 100nM or VUF10661 at 10 $\mu$ M for forty-five minutes at 37°C. Following stimulation, the cells were washed once with HBSS and fixed at room temperature in the dark in a 6% formaldehyde solution for 20 minutes. Cells were subsequently washed four times with PBS and then imaged. The cells were imaged with a Zeiss CSU-X1 spinning disk confocal microscope using the corresponding lasers for GFP (480nm excitation), RFP (561nm excitation), and mCerulean (433nm excitation). Images were analyzed using ImageJ (NIH, Bethesda, MD).

### **RNA sequencing**

Primary, negatively selected, CD8<sup>+</sup> T cells were obtained commercially (*Precision for Medicine*, Bethesda, MD). T cells were cultured in RPMI medium 1640 containing 10% FBS, 1% penicillin/streptomycin at 37°C and 5% CO<sub>2</sub>. Prior to stimulation, T-cells were activated and expanded using anti-CD3 and anti-CD28 magnetic beads, and subsequently recultured without magnetic beads, as previous work has shown that this protocol increases T-cell count and surface expression of CXCR3 (Nakajima et al., 2002). Specifically, T cells were activated using CD3/CD28 T-cell Dynabeads (Thermo Fischer) at a 1:1 bead:cell ratio for three days and then cultured without Dynabeads for three more days in fresh media. Cells were starved for four hours in RPMI medium 1640 containing 0.01% BSA and 1% penicillin/streptomycin and subsequently stimulated with vehicle or chemokine for 2 hours. Total RNA was extracted using the RNeasy Plus RNA Extraction Kit (Qiagen). RNA sequencing was

770 conducted by Novogene Co. (Beijing, China). For heat maps, genes with an adjusted p-value <0.05 were  
771 considered as differentially expressed. For UpSet plots, genes with an adjusted p-value <0.05 and  
772  $|\log_2(\text{Foldchange})| > 0.3$  are shown. For Volcano plots, genes with an adjusted p-value <0.05 and  
773  $|\log_2(\text{Foldchange})| > 0.4$  are labelled. Gene set enrichment analysis was performed to determine whether  
774 chemokine treatments generated significant differences for *a priori* defined set of genes from the Molecular  
775 Signatures database (<https://www.gsea-msigdb.org/gsea/index.jsp>).

### 776 777 **Quantitative Polymerase Chain Reaction (qPCR)**

778 RNA isolated from peripheral blood mononuclear cells were reverse transcribed into complementary DNA  
779 (cDNA) using the iScript cDNA synthesis kit (Bio-Rad) according to the manufacturer's instructions. cDNA was  
780 analyzed using iTaq Universal SYBR Green Supermix (Bio-Rad) using the CXCR3 primers 5'  
781 GCCATGGTCCTTGAGGTGAG 3' and 5' GGAGGTACAGCACGAGTCAC 3' and 18s rRNA primers forward 5'  
782 GTAACCCGTTGAACCCATT 3' and 5' CCATCCAATCGGTAGTAGCG 3'. cDNA levels were measured using  
783 an Applied Biosystems 7300 Real-Time PCR system. PCR was performed first through polymerase activation  
784 and denaturation at 95°C for 30 seconds. cDNA then underwent 40 cycles of denaturation at 95°C for 15  
785 seconds, and annealed, extension, and reading at 60°C for 60 seconds. Data are expressed as fold change ( $2^{-\Delta\Delta C_t}$ )  
786 of each target gene compared to 18s rRNA, and then normalized to No Treatment control.

### 787 788 **DNFB Contact Hypersensitivity Murine Model**

789 Seven-week-old mice were split into groups of 7-10 mice when sensitized. Animals were randomly assigned to  
790 treatment groups and investigators were blinded to pharmacologic treatments. Mice were initially sensitized by  
791 topical application of 50 $\mu$ L of 0.5% DNFB (Sigma Aldrich) in a 4:1 acetone:olive oil solution on their shaved back.  
792 Four days later, they were challenged on their ears with 10 $\mu$ L of 0.3% DNFB with or without Dyngo 4a (50  $\mu$ M).  
793 4, 24, and 48 hours later, 10 $\mu$ L of either vehicle control, VUF10661 (50  $\mu$ M), Dyngo 4a (50  $\mu$ M), or VUF10661  
794 and Dyngo 4a (both at 50  $\mu$ M) dissolved in a 72:18:10 acetone:olive oil:DMSO solution was applied to the ear  
795 by a blinded investigator. Ear thickness was measured at the listed time points with an engineer's micrometer  
796 (Standard Gage). To determine if Dyngo 4a had any effect on ear thickness in the absence of DNFB, we

797 performed the above experiment in the absence of DNFB or VUF10661 and measured mouse ear thickness until  
798 96 hours after initial Dyngo 4a treatment.

### 800 **CXCR3 Ligands**

801 Recombinant Human CXCL9, CXCL10, and CXCL11 (PeproTech) were diluted according to the manufacturer's  
802 specifications, and aliquots were stored at  $-80^{\circ}\text{C}$  until needed for use. VUF10661 (Sigma-Aldrich) was  
803 reconstituted in dimethyl sulfoxide (DMSO) and were stored at  $-20^{\circ}\text{C}$  in a desiccator cabinet.

## 805 **QUANTIFICATION AND STATISTICAL ANALYSIS**

### 807 **Statistical analyses**

808 Dose-response curves were fitted to a log agonist versus stimulus with three parameters (span, baseline, and  
809 EC50), with the minimum baseline corrected to zero using Prism 9.0 (GraphPad, San Diego, CA). Statistical  
810 tests were performed using a one or two-way ANOVA followed by Tukey's multiple comparison's test when  
811 comparing treatment conditions. When comparing ligands or treatment conditions in concentration-response  
812 assays or time-response assays, a two-way ANOVA of ligand and concentration or ligand and AUC, respectively,  
813 was conducted. If a significant interaction effect was observed ( $P < 0.05$ ), then comparative two-way ANOVAs  
814 between individual experimental conditions were performed. Further details of statistical analysis and replicates  
815 are included in the figure legends. Lines represent the mean, and error bars signify the SEM, unless otherwise  
816 noted.

### 818 **Bias Plots**

819 To generate bias plots, raw or normalized dose response data for G protein activation and  $\beta$ -arrestin 2 are plotted  
820 for each chemokine at a specific location. We defined G protein activation as the ability of the chemokine to  
821 induce Gai nucleotide exchange relative to the total amount of Gai present at that location. Best fit lines were  
822 then plotted for each chemokine.

824 KEY RESOURCES TABLE

| REAGENT OR RESOURCE                                                     | SOURCE                      | IDENTIFIER                           |
|-------------------------------------------------------------------------|-----------------------------|--------------------------------------|
| <b>Antibodies</b>                                                       |                             |                                      |
| Donkey polyclonal anti-rabbit IgG peroxidase conjugated                 | Rockland                    | Cat#611-7302; RRID:AB_219747         |
| Sheep polyclonal anti-mouse IgG peroxidase conjugated                   | Rockland                    | Cat#610-603-002; RRID:AB_219694      |
| Mouse monoclonal anti-phospho-p44/42 MAPK 1/2 (ERK1/2) (Thr202/Tyr204)  | Cell Signaling Technologies | Cat#9106; RRID:AB_331768             |
| Rabbit polyclonal anti-MAPK 1/2 (ERK1/2)                                | Millipore Sigma             | Cat#06-182; RRID:AB_310068           |
| <b>Bacterial Strains</b>                                                |                             |                                      |
| XL10-Gold Ultracompetent E. Coli                                        | Agilent                     | Cat#200315                           |
| <b>Chemicals, peptides, and recombinant proteins</b>                    |                             |                                      |
| Recombinant Human CXCL9                                                 | Peprotech                   | Cat#300-26                           |
| Recombinant Human CXCL10                                                | Peprotech                   | Cat#300-12                           |
| Recombinant Human CXCL11                                                | Peprotech                   | Cat#300-46                           |
| VUF10661                                                                | Sigma-Aldrich               | Cat#SML0803                          |
| Dyngo 4a                                                                | Abcam                       | Cat#AB120689                         |
| 1-Fluoro-2,4-dinitrobenzene                                             | Sigma-Aldrich               | Cat#D1529                            |
| GlutaMax                                                                | Gibco                       | Cat#35050061                         |
| Antibiotic-Antimycotic                                                  | Gibco                       | Cat#15240062                         |
| FIAsH-EDT2                                                              | Santa Cruz Biotechnology    | Cat#sc-363644                        |
| Coelenterazine h                                                        | Cayman Chemical             | Cat#16894                            |
| Coelenterazine h                                                        | NanoLight Technology        | Cat#301                              |
| QuikChange Lightning Site-Directed Mutagenesis Kit                      | Agilent                     | Cat#210518                           |
| PhosSTOP                                                                | Sigma-Aldrich               | Cat#4906845001                       |
| cOmplete Protease Inhibitor Cocktail                                    | Sigma-Aldrich               | Cat#11697498001                      |
| SuperSignal West Pico PLUS Chemiluminescent Substrate                   | Thermo Fischer Scientific   | Cat#34580                            |
| Dynabead Human T-Activator CD3/CD28 for T Cell Expansion and Activation | Thermo Fischer Scientific   | Cat#11131D                           |
| D-Luciferin                                                             | Goldbio                     | Cat#LUCK-100                         |
| Isoproterenol                                                           | Sigma-Aldrich               | Cat#I6504                            |
| <b>Critical commercial assays</b>                                       |                             |                                      |
| iScript cDNA Synthesis Kit                                              | Bio-Rad                     | Cat#1708890                          |
| RNeasy Plus Kit                                                         | Qiagen                      | Cat#74134                            |
| iTaq Universal SYBR Green Supermix                                      | Bio-Rad                     | Cat#1725121                          |
| <b>Deposited Data</b>                                                   |                             |                                      |
| CD8+ T-Cell RNA-seq                                                     | This paper; GEO             | GSE192679                            |
| <b>Experimental Models: Cell Lines</b>                                  |                             |                                      |
| Human: HEK293                                                           | ATCC                        | Cat#CRL-1573;RRID:CVCL_0045          |
| Human: 293T $\beta$ -arrestin 1/2 Knock Out                             | Asuka Inoue                 | (Alvarez-Curto <i>et al.</i> , 2016) |



|                                               |                                                   |                                                                                                                       |
|-----------------------------------------------|---------------------------------------------------|-----------------------------------------------------------------------------------------------------------------------|
| Human: CD8+ T-Cells, Negatively Selected      | Precision for Medicine                            | N/A                                                                                                                   |
| <b>Experimental Models: Organisms/strains</b> |                                                   |                                                                                                                       |
| C57BL/6 Female Mice                           | Charles River                                     | Cat#C57BL/6NCrl; RRID:IMSR_CRL:027                                                                                    |
| <b>Oligonucleotides</b>                       |                                                   |                                                                                                                       |
| CXCR3 fwd primer<br>GCCATGGTCCTTGAGGTGAG      | Sigma-Aldrich                                     | N/A                                                                                                                   |
| CXCR3 rev primer<br>GGAGGTACAGCACGAGTCAC      | Sigma-Aldrich                                     | N/A                                                                                                                   |
| 18s fwd primer<br>GTAACCCGTTGAACCCCAT         | Sigma-Aldrich                                     | N/A                                                                                                                   |
| 18s rev primer<br>CCATCCAATCGGTAGTAGCG        | Sigma-Aldrich                                     | N/A                                                                                                                   |
| <b>Recombinant DNA</b>                        |                                                   |                                                                                                                       |
| pcDNA3.1_CXCR3                                | Rajagopal Lab                                     | N/A                                                                                                                   |
| pcDNA3.1_CXCR3-RLuc2                          | Rajagopal Lab                                     | N/A                                                                                                                   |
| pcDNA3.1_Myrpalm-mVenus                       | Rajagopal Lab<br>(Smith <i>et al.</i> , 2017)     | N/A                                                                                                                   |
| pcDNA3.1_2x-Fyve-mvenus                       | Rajagopal Lab<br>(Smith <i>et al.</i> , 2017)     | N/A                                                                                                                   |
| $\beta$ -arrestin 1                           | Lefkowitz Lab                                     | N/A                                                                                                                   |
| $\beta$ -arrestin 2                           | Lefkowitz Lab                                     | N/A                                                                                                                   |
| pcDNA3.1_Mas-KB-1753-Nluc                     | Garcia-Marcos Lab<br>(Maziarz <i>et al.</i> 2020) | N/A                                                                                                                   |
| pcDNA3.1_2xFyve-KB-1753-nLuc                  | This work                                         | N/A                                                                                                                   |
| pcDNA3.1_Gai-mVenus                           | Rajagopal Lab                                     | N/A                                                                                                                   |
| Gai1-LgBit                                    | (Inoue <i>et al.</i> , 2019)                      | N/A                                                                                                                   |
| pcDNA3.1_2xFyve-SmBit                         | This work                                         | N/A                                                                                                                   |
| NLuc-EPAC-VV                                  | Martemyanov Lab<br>(Masuho <i>et al.</i> , 2015)  | N/A                                                                                                                   |
| NLuc-EPAC-VV-NLS                              | This work                                         | N/A                                                                                                                   |
| pBk-HA-1-DI-K44A                              | Lefkowitz Lab                                     | N/A                                                                                                                   |
| SmBit-Barr2                                   | Rajagopal Lab                                     | N/A                                                                                                                   |
| pcDNA3.1_2xFyve-LgBit                         | This work                                         | N/A                                                                                                                   |
| pcDNA3.1_SmBit-Barr2-FIAsH 4                  | This work                                         | N/A                                                                                                                   |
| pcDNA3.1_SmBit-Barr2-FIAsH 5                  | This work                                         | N/A                                                                                                                   |
| pcDNA3.1_LgBit-CAAX                           | This work                                         | N/A                                                                                                                   |
| pcDNA3.1_Cyto-EKAR BRET Biosensor             | This work                                         | N/A                                                                                                                   |
| pcDNA3.1_Nuc-EKAR BRET Biosensor              | This work                                         | N/A                                                                                                                   |
| pGL4.33[luc2P/SRE/Hygro]                      | Promega                                           | Cat#E1340                                                                                                             |
| pGL4.34[luc2P/SRF-RE/Hygro]                   | Promega                                           | Cat#PS087                                                                                                             |
| pcDNA3.1_CXCR3-mCerulean                      | This work                                         | N/A                                                                                                                   |
| pcDNA3.1_CXCR3-GFP                            | This work                                         | N/A                                                                                                                   |
| $\beta$ -arrestin 2-RFP                       | Marc Caron Lab                                    | N/A                                                                                                                   |
| <b>Software and algorithms</b>                |                                                   |                                                                                                                       |
| GraphPad Prism                                | GraphPad Software                                 | <a href="https://www.graphpad.com/scientific-software/prism/">https://www.graphpad.com/scientific-software/prism/</a> |
| ImageJ                                        | (Schneider <i>et al.</i> , 2012)                  | <a href="https://imagej.nih.gov/ij/">https://imagej.nih.gov/ij/</a>                                                   |

|                              |                                    |                                                                                                                                 |
|------------------------------|------------------------------------|---------------------------------------------------------------------------------------------------------------------------------|
| Adobe Illustrator            | Adobe                              | <a href="https://www.adobe.com/">https://www.adobe.com/</a>                                                                     |
| Excel                        | Microsoft                          | <a href="https://www.microsoft.com/en-us/microsoft-365/excel">https://www.microsoft.com/en-us/microsoft-365/excel</a>           |
| ImageLab                     | Bio-Rad                            | <a href="https://www.bio-rad.com/en-us/product/image-lab-software">https://www.bio-rad.com/en-us/product/image-lab-software</a> |
| BioRender                    | BioRender                          | <a href="https://biorender.com/">https://biorender.com/</a>                                                                     |
| Gene Set Enrichment Analysis | (Subramanian <i>et al.</i> , 2005) | <a href="https://www.gsea-msigdb.org/gsea/index.jsp">https://www.gsea-msigdb.org/gsea/index.jsp</a>                             |

825

826



827 **SUPPLEMENTAL FIGURE TITLES AND LEGENDS**

828  
829 **Supplemental Figure 1: Gai mediated cAMP inhibition at CXCR3 as measured using a nuclear localized**  
830 **cAMP sensor. Related to Figure 3.**

831 **(A)** Confocal microscopy images of HEK293 cells transfected with CXCR3-GFP,  $\beta$ -arrestin 2-RFP ( $\beta$ -arr-2-RFP),  
832 and either pcDNA 3.1 or Dynamin K44A demonstrating successful inhibition of endocytosis with overexpression  
833 of Dynamin K44A. **(B)** Confocal and brightfield microscopy images of HEK293 cells transfected with a nuclear  
834 localized cAMP BRET biosensor (NLuc-EPAC-VV-NLS). Agonist dose-dependent inhibition of isoproterenol-  
835 induced nuclear cAMP production by the chemokine in HEK293 cells with concurrent transfection of **(C)** pcDNA  
836 3.1 or **(D)** Dynamin K44A to inhibit internalization. **(E to G)** Kinetic data and **(H to J)** agonist dose-dependent  
837 inhibition of cAMP signal in HEK293 cells treated with chemokine. Data are the mean  $\pm$  SEM, n = 5. \* denotes  
838 statistically significant differences between  $E_{max}$  for dose response data of pcDNA 3.1 versus Dynamin K44A  
839 transfection conditions at each ligand.

840  
841 **Supplemental Figure 2: Plot of maximal G protein and  $\beta$ -arrestin signaling at different subcellular**  
842 **locations. Related to Figure 4.** Plot of maximal G protein activation and  $\beta$ -arrestin 2 recruitment at the plasma  
843 membrane and endosome. All data are normalized to the values for CXCL11 at the plasma membrane. Gai  
844 activation at the endosome was calculated by dividing the relative amount of endosomal Gai-GTP by total  
845 endosomal Gai.

846  
847 **Supplemental Figure 3: ERK activation at 30 and 60 minutes and premise of ERK biosensor. Related to**  
848 **Figure 5. (A)** Representative immunoblot of ERK1/2 phosphorylation following 30 and 60 minutes of stimulation  
849 with vehicle control or 100nM of chemokine with transfection of pcDNA 3.1 or Dynamin K44A. **(B)** Schematic of  
850 the BRET based ERK biosensor (Harvey et al., 2008). The biosensor consists of an N-terminal nanoluciferase  
851 (NLuc), phosphobinding domain, flexible linker, ERK substrate peptide, ERK docking domain, and C-terminal  
852 mVenus. Following phosphorylation of the target peptide by activated ERK, the phosphobinding domain will  
853 complex with the phosphothreonine, bringing the NLuc and mVenus in close proximity to generate a BRET  
854 signal. **(C and D)** Confocal microscopy of the ERK biosensors targeted to the cytoplasm or the nucleus.

855

856 **Supplemental Figure 4: Approach and source data for RNA-seq to assess transcription in CD8+ T cells.**

857 **Related to Figure 6. (A)** Schematic of experimental design of RNA-seq experiments on activated primary CD8+

858 T cells. T cells were cultured with anti-CD3/CD28 T-cell Dynabeads (Thermo Fisher) for three days and then

859 three days without Dynabeads to induce T cell activation and expansion. T cells were serum starved and

860 incubated with the listed treatment condition for 2 hours. RNA was then isolated and then processed for RNA

861 sequencing. **(B)** Quantitative PCR (qPCR) of peripheral blood mononuclear cells to examine CXCR3 transcript

862 levels following stimulation with anti-CD3/CD28 magnetic beads. Cells were cultured under five conditions: No

863 stimulation, 2 days with magnetic beads (2d On), 2 days with magnetic beads followed by 2 days without

864 magnetic beads (2d On + 2d Off), 3 days with magnetic beads (3d On), or 3 days with magnetic beads followed

865 by 3 days without magnetic beads (3d On + 3d Off). Transcript levels were normalized using 18s rRNA, and then

866 subsequently normalized to the No stimulation condition. Data are the mean  $\pm$  SEM, n=3. **(C-F)** Venn diagram

867 showing common transcripts identified across three replicates within each treatment group demonstrating high

868 degrees of replicability between replicate samples. UpSet Plots demonstrating similarly or differentially **(G)**

869 upregulated or **(H)** downregulated transcripts at a Log<sub>2</sub>(Fold Change) of  $>\pm 0.3$ . The UpSet Plots demonstrate

870 that the majority of differential gene expression observed in our data set is not shared between the chemokines.

871 **(I-K)** Volcano plots comparing differentially expressed transcripts between the listed treatment condition and

872 vehicle control. Labelled transcripts are statistically significant and demonstrate a Log<sub>2</sub>(Fold Change) of  $>\pm 0.4$ .

873

874 **Supplemental Figure 5: Dyngo 4a treatment alone does not illicit an inflammatory response. Related to**

875 **Figure 7.** Ear thickness following application of Dyngo 4a (50nM) or DMSO control in the absence of VUF10661

876 or DNFB to assess for a nonspecific effect of Dyngo 4a treatment. Mice were treated with listed treatments at 0

877 hours, 24 hours, and 48 hours. Data are means  $\pm$  SEM of 5-6 mice per treatment group. \*P<.05 using a two-way

878 ANOVA analysis.

879

## References

- Alvarez-Curto, E., Inoue, A., Jenkins, L., Raihan, S.Z., Prihandoko, R., Tobin, A.B., and Milligan, G. (2016). Targeted Elimination of G Proteins and Arrestins Defines Their Specific Contributions to Both Intensity and Duration of G Protein-coupled Receptor Signaling. *J Biol Chem* 291, 27147-27159. 10.1074/jbc.M116.754887.
- Berchiche, Y.A., and Sakmar, T.P. (2016). CXC Chemokine Receptor 3 Alternative Splice Variants Selectively Activate Different Signaling Pathways. *Mol Pharmacol* 90, 483-495. 10.1124/mol.116.105502.
- Cahill, T.J., Thomsen, A.R., Tarrasch, J.T., Plouffe, B., Nguyen, A.H., Yang, F., Huang, L.Y., Kahsai, A.W., Bassoni, D.L., Gavino, B.J., et al. (2017). Distinct conformations of GPCR- $\beta$ -arrestin complexes mediate desensitization, signaling, and endocytosis. *Proc Natl Acad Sci U S A* 114, 2562-2567. 10.1073/pnas.1701529114.
- Calebiro, D., and Maiellaro, I. (2014). cAMP signaling microdomains and their observation by optical methods. *Front Cell Neurosci* 8, 350. 10.3389/fncel.2014.00350.
- Calebiro, D., Nikolaev, V.O., Gagliani, M.C., de Filippis, T., Dees, C., Tacchetti, C., Persani, L., and Lohse, M.J. (2009). Persistent cAMP-signals triggered by internalized G-protein-coupled receptors. *PLoS Biol* 7, e1000172. 10.1371/journal.pbio.1000172.
- Chen, Q., Iverson, T.M., and Gurevich, V.V. (2018). Structural Basis of Arrestin-Dependent Signal Transduction. *Trends Biochem Sci* 43, 412-423. 10.1016/j.tibs.2018.03.005.
- Claing, A., Chen, W., Miller, W.E., Vitale, N., Moss, J., Premont, R.T., and Lefkowitz, R.J. (2001).  $\beta$ -Arrestin-mediated ADP-ribosylation factor 6 activation and  $\beta$ 2-adrenergic receptor endocytosis. *J Biol Chem* 276, 42509-42513. 10.1074/jbc.M108399200.
- Coffa, S., Breitman, M., Hanson, S.M., Callaway, K., Kook, S., Dalby, K.N., and Gurevich, V.V. (2011). The effect of arrestin conformation on the recruitment of c-Raf1, MEK1, and ERK1/2 activation. *PLoS One* 6, e28723. 10.1371/journal.pone.0028723.
- Colvin, R.A., Campanella, G.S., Manice, L.A., and Luster, A.D. (2006). CXCR3 requires tyrosine sulfation for ligand binding and a second extracellular loop arginine residue for ligand-induced chemotaxis. *Mol Cell Biol* 26, 5838-5849. 10.1128/MCB.00556-06.
- Colvin, R.A., Campanella, G.S., Sun, J., and Luster, A.D. (2004). Intracellular domains of CXCR3 that mediate CXCL9, CXCL10, and CXCL11 function. *J Biol Chem* 279, 30219-30227. 10.1074/jbc.M403595200.
- Corbisier, J., Galès, C., Huszagh, A., Parmentier, M., and Springael, J.Y. (2015). Biased signaling at chemokine receptors. *J Biol Chem* 290, 9542-9554. 10.1074/jbc.M114.596098.
- Damke, H., Baba, T., Warnock, D.E., and Schmid, S.L. (1994). Induction of mutant dynamin specifically blocks endocytic coated vesicle formation. *J Cell Biol* 127, 915-934. 10.1083/jcb.127.4.915.
- Eichel, K., Jullie, D., Barsi-Rhyne, B., Latorraca, N.R., Masureel, M., Sibarita, J.B., Dror, R.O., and von Zastrow, M. (2018). Catalytic activation of  $\beta$ -arrestin by GPCRs. *Nature* 557, 381-386. 10.1038/s41586-018-0079-1.
- Eichel, K., Jullie, D., and von Zastrow, M. (2016).  $\beta$ -Arrestin drives MAP kinase signalling from clathrin-coated structures after GPCR dissociation. *Nat Cell Biol* 18, 303-310. 10.1038/ncb3307.
- Eichel, K., and von Zastrow, M. (2018). Subcellular Organization of GPCR Signaling. *Trends Pharmacol Sci* 39, 200-208. 10.1016/j.tips.2017.11.009.
- Eiger, D.S., Boldizsar, N., Honeycutt, C.C., Gardner, J., and Rajagopal, S. (2021). Biased agonism at chemokine receptors. *Cell Signal* 78, 109862. 10.1016/j.cellsig.2020.109862.
- Ferrandon, S., Feinstein, T.N., Castro, M., Wang, B., Bouley, R., Potts, J.T., Gardella, T.J., and Vilardaga, J.P. (2009). Sustained cyclic AMP production by parathyroid hormone receptor endocytosis. *Nat Chem Biol* 5, 734-742. 10.1038/nchembio.206.
- Goodman, O.B., Jr., Krupnick, J.G., Santini, F., Gurevich, V.V., Penn, R.B., Gagnon, A.W., Keen, J.H., and Benovic, J.L. (1996).  $\beta$ -Arrestin acts as a clathrin adaptor in endocytosis of the  $\beta$ 2-adrenergic receptor. *Nature* 383, 447-450. 10.1038/383447a0.
- Gregory, K.J., Hall, N.E., Tobin, A.B., Sexton, P.M., and Christopoulos, A. (2010). Identification of orthosteric and allosteric site mutations in M2 muscarinic acetylcholine receptors that contribute to ligand-selective signaling bias. *J Biol Chem* 285, 7459-7474. 10.1074/jbc.M109.094011.
- Groom, J.R., and Luster, A.D. (2011). CXCR3 in T cell function. *Exp Cell Res* 317, 620-631. 10.1016/j.yexcr.2010.12.017.

- 933 Grundmann, M., Merten, N., Malfacini, D., Inoue, A., Preis, P., Simon, K., Ruttiger, N., Ziegler, N., Benkel, T.,  
934 Schmitt, N.K., et al. (2018). Lack of beta-arrestin signaling in the absence of active G proteins. *Nat Commun* 9,  
935 341. 10.1038/s41467-017-02661-3.
- 936 Harvey, C.D., Ehrhardt, A.G., Cellurale, C., Zhong, H., Yasuda, R., Davis, R.J., and Svoboda, K. (2008). A  
937 genetically encoded fluorescent sensor of ERK activity. *Proc Natl Acad Sci U S A* 105, 19264-19269.  
938 10.1073/pnas.0804598105.
- 939 Hill, C.S., Wynne, J., and Treisman, R. (1995). The Rho family GTPases RhoA, Rac1, and CDC42Hs regulate  
940 transcriptional activation by SRF. *Cell* 81, 1159-1170. 10.1016/s0092-8674(05)80020-0.
- 941 Inoue, A., Raimondi, F., Kadji, F.M.N., Singh, G., Kishi, T., Uwamizu, A., Ono, Y., Shinjo, Y., Ishida, S., Arang,  
942 N., et al. (2019). Illuminating G-Protein-Coupling Selectivity of GPCRs. *Cell* 177, 1933-1947 e1925.  
943 10.1016/j.cell.2019.04.044.
- 944 Irannejad, R., Pessino, V., Mika, D., Huang, B., Wedegaertner, P.B., Conti, M., and von Zastrow, M. (2017).  
945 Functional selectivity of GPCR-directed drug action through location bias. *Nat Chem Biol* 13, 799-806.  
946 10.1038/nchembio.2389.
- 947 Irannejad, R., Tomshine, J.C., Tomshine, J.R., Chevalier, M., Mahoney, J.P., Steyaert, J., Rasmussen, S.G.,  
948 Sunahara, R.K., El-Samad, H., Huang, B., and von Zastrow, M. (2013). Conformational biosensors reveal  
949 GPCR signalling from endosomes. *Nature* 495, 534-538. 10.1038/nature12000.
- 950 Irannejad, R., Tsvetanova, N.G., Lobingier, B.T., and von Zastrow, M. (2015). Effects of endocytosis on  
951 receptor-mediated signaling. *Curr Opin Cell Biol* 35, 137-143. 10.1016/j.ceb.2015.05.005.
- 952 Irannejad, R., and von Zastrow, M. (2014). GPCR signaling along the endocytic pathway. *Curr Opin Cell Biol*  
953 27, 109-116. 10.1016/j.ceb.2013.10.003.
- 954 Janetzko, J., Kise, R., Barsi-Ryne, B., Siepe, D.H., Heydenreich, F.M., Masureel, M., Kawakami, K., Garcia,  
955 K.C., von Zastrow, M., Inoue, A., and Kobilka, B.K. (2021). Membrane phosphoinositides stabilize GPCR-  
956 arrestin complexes and offer temporal control of complex assembly and dynamics. *bioRxiv*,  
957 2021.2010.2009.463790. 10.1101/2021.10.09.463790.
- 958 Jean-Charles, P.Y., Kaur, S., and Shenoy, S.K. (2017). G Protein-Coupled Receptor Signaling Through beta-  
959 Arrestin-Dependent Mechanisms. *J Cardiovasc Pharmacol* 70, 142-158. 10.1097/FJC.0000000000000482.
- 960 Jensen, D.D., Lieu, T., Halls, M.L., Veldhuis, N.A., Imlach, W.L., Mai, Q.N., Poole, D.P., Quach, T., Aurelio, L.,  
961 Conner, J., et al. (2017). Neurokinin 1 receptor signaling in endosomes mediates sustained nociception and is  
962 a viable therapeutic target for prolonged pain relief. *Sci Transl Med* 9. 10.1126/scitranslmed.aal3447.
- 963 Jimenez-Vargas, N.N., Yu, Y., Jensen, D.D., Bok, D.D., Wisdom, M., Latorre, R., Lopez, C., Jaramillo-Polanco,  
964 J.O., Degro, C., Guzman-Rodriguez, M., et al. (2021). Agonist that activates the micro-opioid receptor in  
965 acidified microenvironments inhibits colitis pain without side effects. *Gut*. 10.1136/gutjnl-2021-324070.
- 966 Jirkof, P., Bratcher, N., Medina, L., Strasburg, D., Ebert, P., and Gaskill, B.N. (2020). The effect of group size,  
967 age and handling frequency on inter-male aggression in CD 1 mice. *Sci Rep* 10, 2253. 10.1038/s41598-020-  
968 59012-4.
- 969 Johnston, C.A., Willard, F.S., Ramer, J.K., Blaesius, R., Roques, C.N., and Siderovski, D.P. (2008). State-  
970 selective binding peptides for heterotrimeric G-protein subunits: novel tools for investigating G-protein signaling  
971 dynamics. *Comb Chem High Throughput Screen* 11, 370-381. 10.2174/138620708784534798.
- 972 Kamal, M., and Jockers, R. (2011). Biological Significance of GPCR Heteromerization in the Neuro-Endocrine  
973 System. *Front Endocrinol (Lausanne)* 2, 2. 10.3389/fendo.2011.00002.
- 974 Karl, K., Paul, M.D., Pasquale, E.B., and Hristova, K. (2020). Ligand bias in receptor tyrosine kinase signaling.  
975 *J Biol Chem* 295, 18494-18507. 10.1074/jbc.REV120.015190.
- 976 Khater, M., Wei, Z., Xu, X., Huang, W., Lokeshwar, B.L., Lambert, N.A., and Wu, G. (2021). G protein  
977 betagamma translocation to the Golgi apparatus activates MAPK via p110gamma-p101 heterodimers. *J Biol*  
978 *Chem* 296, 100325. 10.1016/j.jbc.2021.100325.
- 979 Kotowski, S.J., Hopf, F.W., Seif, T., Bonci, A., and von Zastrow, M. (2011). Endocytosis promotes rapid  
980 dopaminergic signaling. *Neuron* 71, 278-290. 10.1016/j.neuron.2011.05.036.
- 981 Kumari, P., Srivastava, A., Banerjee, R., Ghosh, E., Gupta, P., Ranjan, R., Chen, X., Gupta, B., Gupta, C.,  
982 Jaiman, D., and Shukla, A.K. (2016). Functional competence of a partially engaged GPCR-beta-arrestin  
983 complex. *Nat Commun* 7, 13416. 10.1038/ncomms13416.
- 984 Laporte, S.A., Oakley, R.H., Zhang, J., Holt, J.A., Ferguson, S.S., Caron, M.G., and Barak, L.S. (1999). The  
985 beta2-adrenergic receptor/betaarrestin complex recruits the clathrin adaptor AP-2 during endocytosis. *Proc*  
986 *Natl Acad Sci U S A* 96, 3712-3717. 10.1073/pnas.96.7.3712.



- 987 Latorraca, N.R., Wang, J.K., Bauer, B., Townshend, R.J.L., Hollingsworth, S.A., Olivieri, J.E., Xu, H.E.,  
988 Sommer, M.E., and Dror, R.O. (2018). Molecular mechanism of GPCR-mediated arrestin activation. *Nature*  
989 *557*, 452-456. 10.1038/s41586-018-0077-3.
- 990 Lee, M.H., Appleton, K.M., Strungs, E.G., Kwon, J.Y., Morinelli, T.A., Peterson, Y.K., Laporte, S.A., and  
991 Luttrell, L.M. (2016). The conformational signature of beta-arrestin2 predicts its trafficking and signalling  
992 functions. *Nature* *531*, 665-668. 10.1038/nature17154.
- 993 Lefkowitz, R.J., and Shenoy, S.K. (2005). Transduction of receptor signals by beta-arrestins. *Science* *308*,  
994 512-517. 10.1126/science.1109237.
- 995 Luttrell, L.M., Wang, J., Plouffe, B., Smith, J.S., Yamani, L., Kaur, S., Jean-Charles, P.Y., Gauthier, C., Lee,  
996 M.H., Pani, B., et al. (2018). Manifold roles of beta-arrestins in GPCR signaling elucidated with siRNA and  
997 CRISPR/Cas9. *Sci Signal* *11*. 10.1126/scisignal.aat7650.
- 998 Mantovani, A. (1999). The chemokine system: redundancy for robust outputs. *Immunol Today* *20*, 254-257.  
999 10.1016/s0167-5699(99)01469-3.
- 000 Masuho, I., Ostrovskaya, O., Kramer, G.M., Jones, C.D., Xie, K., and Martemyanov, K.A. (2015). Distinct  
001 profiles of functional discrimination among G proteins determine the actions of G protein-coupled receptors. *Sci*  
002 *Signal* *8*, ra123. 10.1126/scisignal.aab4068.
- 003 Maziarz, M., Park, J.C., Leyme, A., Marivin, A., Garcia-Lopez, A., Patel, P.P., and Garcia-Marcos, M. (2020a).  
004 Revealing the Activity of Trimeric G-proteins in Live Cells with a Versatile Biosensor Design. *Cell* *182*, 770-785  
005 e716. 10.1016/j.cell.2020.06.020.
- 006 Maziarz, M., Park, J.C., Leyme, A., Marivin, A., Garcia-Lopez, A., Patel, P.P., and Garcia-Marcos, M. (2020b).  
007 Revealing the Activity of Trimeric G-proteins in Live Cells with a Versatile Biosensor Design. *Cell* *182*, 770-  
008 785.e716. 10.1016/j.cell.2020.06.020.
- 009 McCluskey, A., Daniel, J.A., Hadzic, G., Chau, N., Clayton, E.L., Mariana, A., Whiting, A., Gorgani, N.N., Lloyd,  
010 J., Quan, A., et al. (2013). Building a better dynasore: the dyngo compounds potently inhibit dynamin and  
011 endocytosis. *Traffic* *14*, 1272-1289. 10.1111/tra.12119.
- 012 McDonald, P.H., Cote, N.L., Lin, F.T., Premont, R.T., Pitcher, J.A., and Lefkowitz, R.J. (1999). Identification of  
013 NSF as a beta-arrestin1-binding protein. Implications for beta2-adrenergic receptor regulation. *J Biol Chem*  
014 *274*, 10677-10680. 10.1074/jbc.274.16.10677.
- 015 Meiser, A., Mueller, A., Wise, E.L., McDonagh, E.M., Petit, S.J., Saran, N., Clark, P.C., Williams, T.J., and  
016 Pease, J.E. (2008). The chemokine receptor CXCR3 is degraded following internalization and is replenished at  
017 the cell surface by de novo synthesis of receptor. *J Immunol* *180*, 6713-6724. 10.4049/jimmunol.180.10.6713.
- 018 Mikucki, M.E., Fisher, D.T., Matsuzaki, J., Skitzki, J.J., Gaulin, N.B., Muhitch, J.B., Ku, A.W., Frelinger, J.G.,  
019 Odunsi, K., Gajewski, T.F., et al. (2015). Non-redundant requirement for CXCR3 signalling during tumoricidal  
020 T-cell trafficking across tumour vascular checkpoints. *Nat Commun* *6*, 7458. 10.1038/ncomms8458.
- 021 Mohammad Nezhady, M.A., Rivera, J.C., and Chemtob, S. (2020). Location Bias as Emerging Paradigm in  
022 GPCR Biology and Drug Discovery. *iScience* *23*, 101643. 10.1016/j.isci.2020.101643.
- 023 Musheshe, N., Schmidt, M., and Zaccolo, M. (2018). cAMP: From Long-Range Second Messenger to  
024 Nanodomain Signalling. *Trends Pharmacol Sci* *39*, 209-222. 10.1016/j.tips.2017.11.006.
- 025 Nakajima, C., Mukai, T., Yamaguchi, N., Morimoto, Y., Park, W.R., Iwasaki, M., Gao, P., Ono, S., Fujiwara, H.,  
026 and Hamaoka, T. (2002). Induction of the chemokine receptor CXCR3 on TCR-stimulated T cells: dependence  
027 on the release from persistent TCR-triggering and requirement for IFN-gamma stimulation. *Eur J Immunol* *32*,  
028 1792-1801. 10.1002/1521-4141(200206)32:6<1792::AID-IMMU1792>3.0.CO;2-0.
- 029 Nguyen, A.H., Thomsen, A.R.B., Cahill, T.J., 3rd, Huang, R., Huang, L.Y., Marcink, T., Clarke, O.B., Heissel,  
030 S., Masoudi, A., Ben-Hail, D., et al. (2019). Structure of an endosomal signaling GPCR-G protein-beta-arrestin  
031 megacomplex. *Nat Struct Mol Biol* *26*, 1123-1131. 10.1038/s41594-019-0330-y.
- 032 Oakley, R.H., Laporte, S.A., Holt, J.A., Caron, M.G., and Barak, L.S. (2000). Differential affinities of visual  
033 arrestin, beta arrestin1, and beta arrestin2 for G protein-coupled receptors delineate two major classes of  
034 receptors. *J Biol Chem* *275*, 17201-17210. 10.1074/jbc.M910348199.
- 035 Oldham, W.M., and Hamm, H.E. (2008). Heterotrimeric G protein activation by G-protein-coupled receptors.  
036 *Nat Rev Mol Cell Biol* *9*, 60-71. 10.1038/nrm2299.
- 037 Olsson, I.A.S., and Westlund, K. (2007). More than numbers matter: The effect of social factors on behaviour  
038 and welfare of laboratory rodents and non-human primates. *Applied Animal Behaviour Science* *103*, 229-254.  
039 <https://doi.org/10.1016/j.applanim.2006.05.022>.

- 040 Pack, T.F., Orlen, M.I., Ray, C., Peterson, S.M., and Caron, M.G. (2018). The dopamine D2 receptor can  
041 directly recruit and activate GRK2 without G protein activation. *J Biol Chem* 293, 6161-6171.  
042 10.1074/jbc.RA117.001300.
- 043 Pavlos, N.J., and Friedman, P.A. (2017). GPCR Signaling and Trafficking: The Long and Short of It. *Trends*  
044 *Endocrinol Metab* 28, 213-226. 10.1016/j.tem.2016.10.007.
- 045 Peng, G.E., Pessino, V., Huang, B., and von Zastrow, M. (2021). Spatial decoding of endosomal cAMP signals  
046 by a metastable cytoplasmic PKA network. *Nat Chem Biol* 17, 558-566. 10.1038/s41589-021-00747-0.
- 047 Rabin, R.L., Park, M.K., Liao, F., Swofford, R., Stephany, D., and Farber, J.M. (1999). Chemokine receptor  
048 responses on T cells are achieved through regulation of both receptor expression and signaling. *J Immunol*  
049 162, 3840-3850.
- 050 Rajagopal, S., Ahn, S., Rominger, D.H., Gowen-MacDonald, W., Lam, C.M., Dewire, S.M., Violin, J.D., and  
051 Lefkowitz, R.J. (2011). Quantifying ligand bias at seven-transmembrane receptors. *Mol Pharmacol* 80, 367-  
052 377. 10.1124/mol.111.072801.
- 053 Rajagopal, S., Bassoni, D.L., Campbell, J.J., Gerard, N.P., Gerard, C., and Wehrman, T.S. (2013). Biased  
054 agonism as a mechanism for differential signaling by chemokine receptors. *The Journal of biological chemistry*  
055 288, 35039-35048. 10.1074/jbc.M113.479113.
- 056 Schmidt, E.V. (1999). The role of c-myc in cellular growth control. *Oncogene* 18, 2988-2996.  
057 10.1038/sj.onc.1202751.
- 058 Schneider, C.A., Rasband, W.S., and Eliceiri, K.W. (2012). NIH Image to ImageJ: 25 years of image analysis.  
059 *Nat Methods* 9, 671-675. 10.1038/nmeth.2089.
- 060 Shukla, A.K., Manglik, A., Kruse, A.C., Xiao, K., Reis, R.I., Tseng, W.C., Staus, D.P., Hilger, D., Uysal, S.,  
061 Huang, L.Y., et al. (2013). Structure of active beta-arrestin-1 bound to a G-protein-coupled receptor  
062 phosphopeptide. *Nature* 497, 137-141. 10.1038/nature12120.
- 063 Smith, J.S., Alagesan, P., Desai, N.K., Pack, T.F., Wu, J.H., Inoue, A., Freedman, N.J., and Rajagopal, S.  
064 (2017). C-X-C Motif Chemokine Receptor 3 Splice Variants Differentially Activate Beta-Arrestins to Regulate  
065 Downstream Signaling Pathways. *Molecular pharmacology* 92, 136-150. 10.1124/mol.117.108522.
- 066 Smith, J.S., Lefkowitz, R.J., and Rajagopal, S. (2018a). Biased signalling: from simple switches to allosteric  
067 microprocessors. *Nat Rev Drug Discov* 17, 243-260. 10.1038/nrd.2017.229.
- 068 Smith, J.S., Nicholson, L.T., Suwanpradid, J., Glenn, R.A., Knape, N.M., Alagesan, P., Gundry, J.N.,  
069 Wehrman, T.S., Atwater, A.R., Gunn, M.D., et al. (2018b). Biased agonists of the chemokine receptor CXCR3  
070 differentially control chemotaxis and inflammation. *Sci Signal* 11. 10.1126/scisignal.aaq1075.
- 071 Sriram, K., and Insel, P.A. (2018). G Protein-Coupled Receptors as Targets for Approved Drugs: How Many  
072 Targets and How Many Drugs? *Mol Pharmacol* 93, 251-258. 10.1124/mol.117.111062.
- 073 Subramanian, A., Tamayo, P., Mootha, V.K., Mukherjee, S., Ebert, B.L., Gillette, M.A., Paulovich, A., Pomeroy,  
074 S.L., Golub, T.R., Lander, E.S., and Mesirov, J.P. (2005). Gene set enrichment analysis: a knowledge-based  
075 approach for interpreting genome-wide expression profiles. *Proc Natl Acad Sci U S A* 102, 15545-15550.  
076 10.1073/pnas.0506580102.
- 077 Thomsen, A.R.B., Jensen, D.D., Hicks, G.A., and Bunnett, N.W. (2018). Therapeutic Targeting of Endosomal  
078 G-Protein-Coupled Receptors. *Trends Pharmacol Sci* 39, 879-891. 10.1016/j.tips.2018.08.003.
- 079 Thomsen, A.R.B., Plouffe, B., Cahill, T.J., 3rd, Shukla, A.K., Tarrasch, J.T., Dosey, A.M., Kahsai, A.W.,  
080 Strachan, R.T., Pani, B., Mahoney, J.P., et al. (2016). GPCR-G Protein-beta-Arrestin Super-Complex Mediates  
081 Sustained G Protein Signaling. *Cell* 166, 907-919. 10.1016/j.cell.2016.07.004.
- 082 Tsvetanova, N.G., Irannejad, R., and von Zastrow, M. (2015). G protein-coupled receptor (GPCR) signaling via  
083 heterotrimeric G proteins from endosomes. *J Biol Chem* 290, 6689-6696. 10.1074/jbc.R114.617951.
- 084 Tsvetanova, N.G., and von Zastrow, M. (2014). Spatial encoding of cyclic AMP signaling specificity by GPCR  
085 endocytosis. *Nat Chem Biol* 10, 1061-1065. 10.1038/nchembio.1665.
- 086 Whitmarsh, A.J., Shore, P., Sharrocks, A.D., and Davis, R.J. (1995). Integration of MAP kinase signal  
087 transduction pathways at the serum response element. *Science* 269, 403-407. 10.1126/science.7618106.
- 088 Wootten, D., Christopoulos, A., Marti-Solano, M., Babu, M.M., and Sexton, P.M. (2018). Mechanisms of  
089 signalling and biased agonism in G protein-coupled receptors. *Nat Rev Mol Cell Biol* 19, 638-653.  
090 10.1038/s41580-018-0049-3.
- 091 Zalewska, M., Siara, M., and Sajewicz, W. (2014). G protein-coupled receptors: abnormalities in signal  
092 transmission, disease states and pharmacotherapy. *Acta Pol Pharm* 71, 229-243.
- 093 Zhang, Y., Devries, M.E., and Skolnick, J. (2006). Structure modeling of all identified G protein-coupled  
094 receptors in the human genome. *PLoS Comput Biol* 2, e13. 10.1371/journal.pcbi.0020013.



**FIGURE 1****A**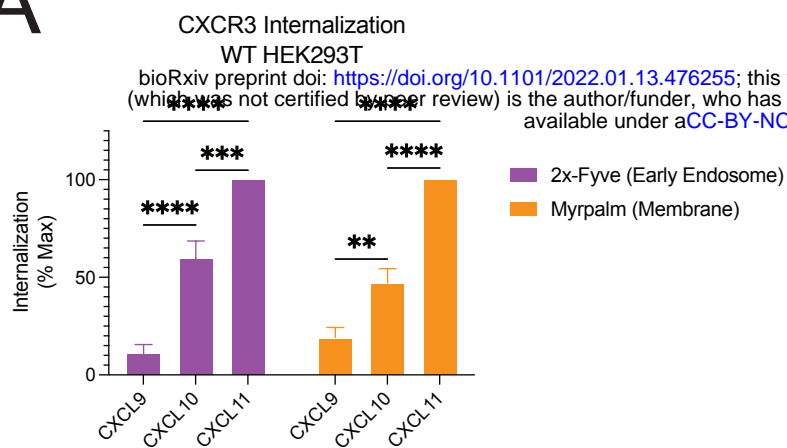**B**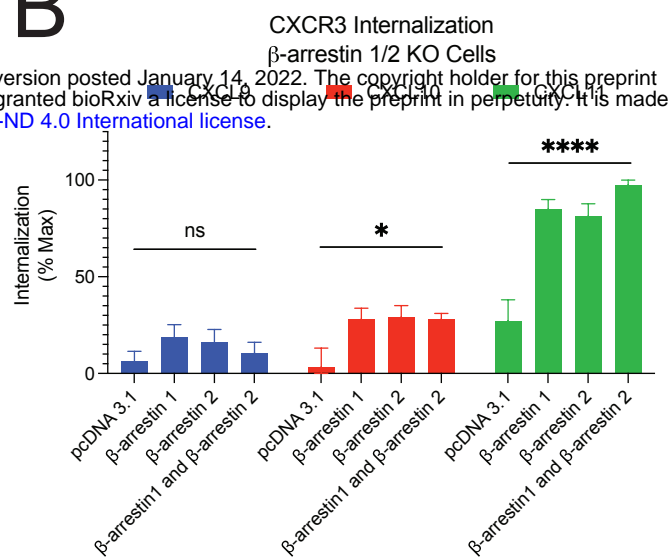**C**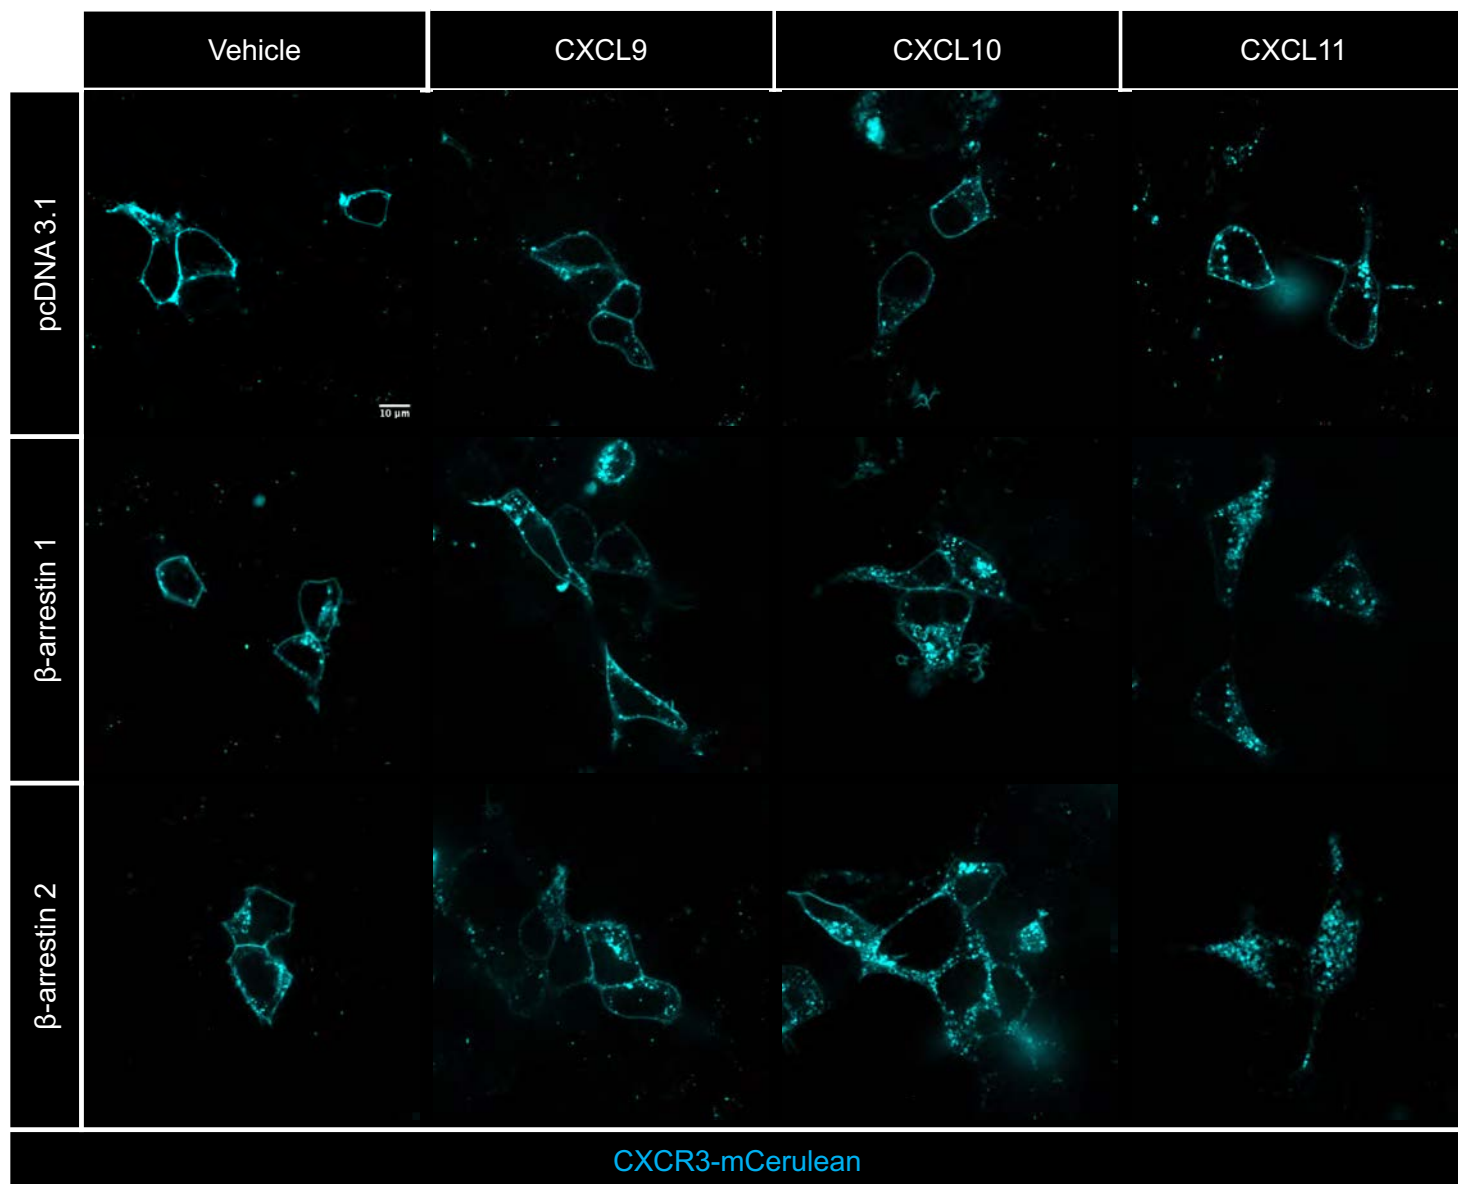



**FIGURE 2**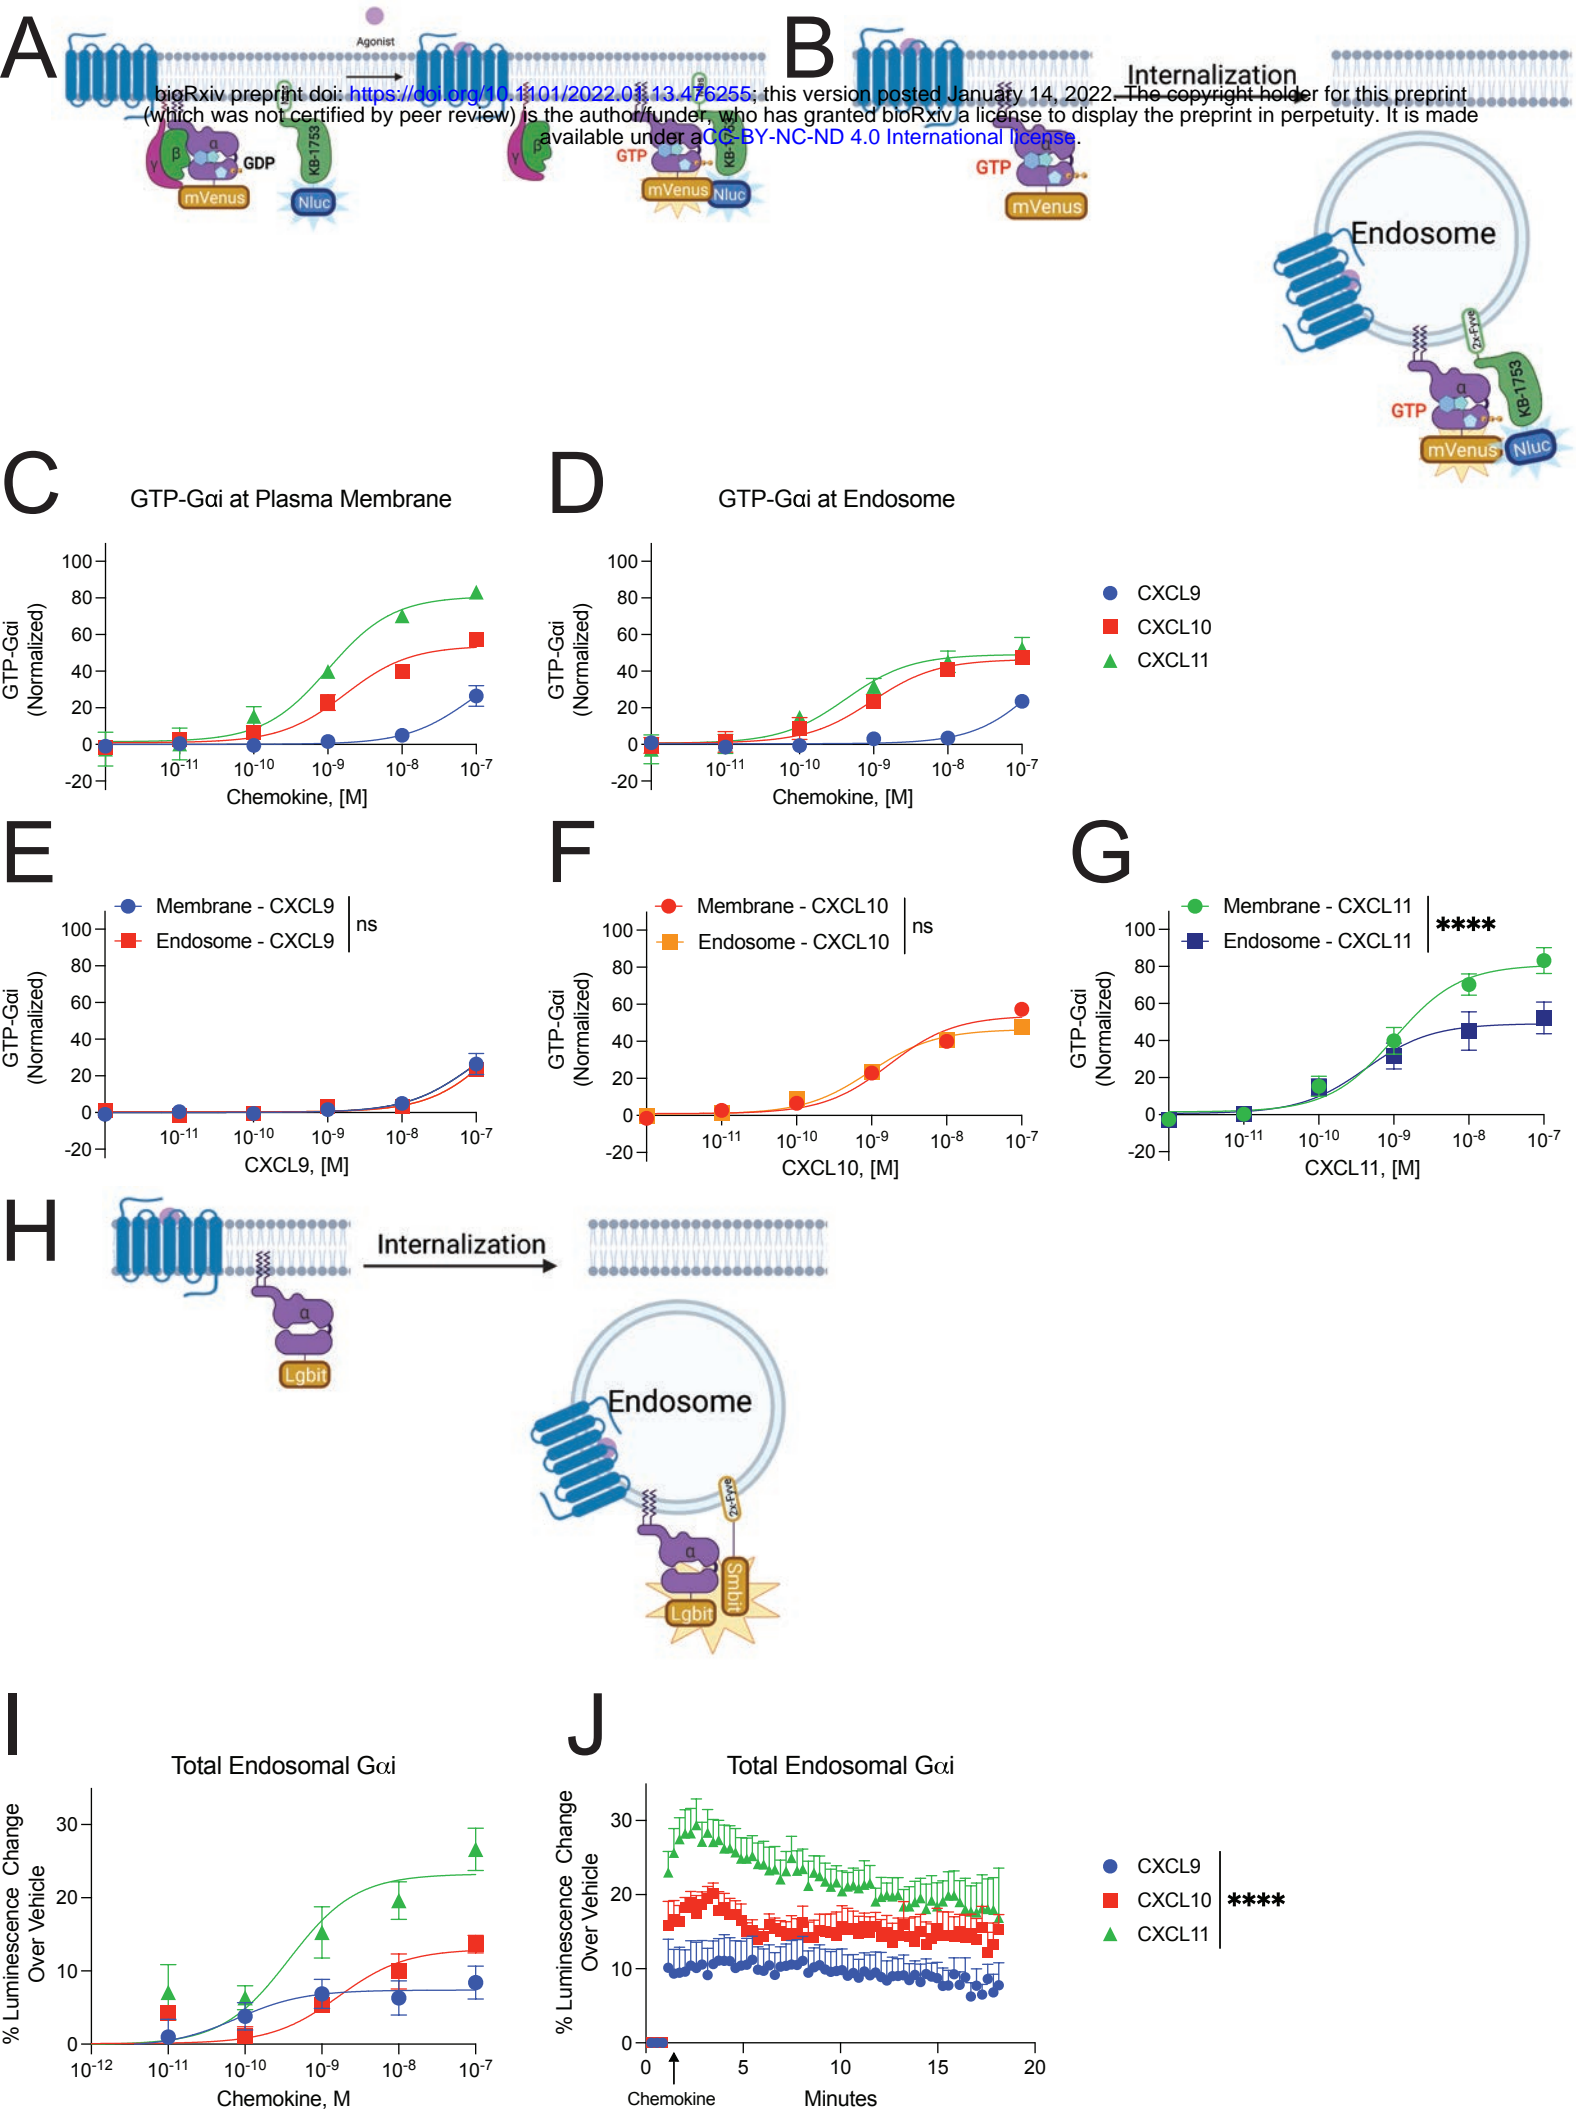

**FIGURE 3**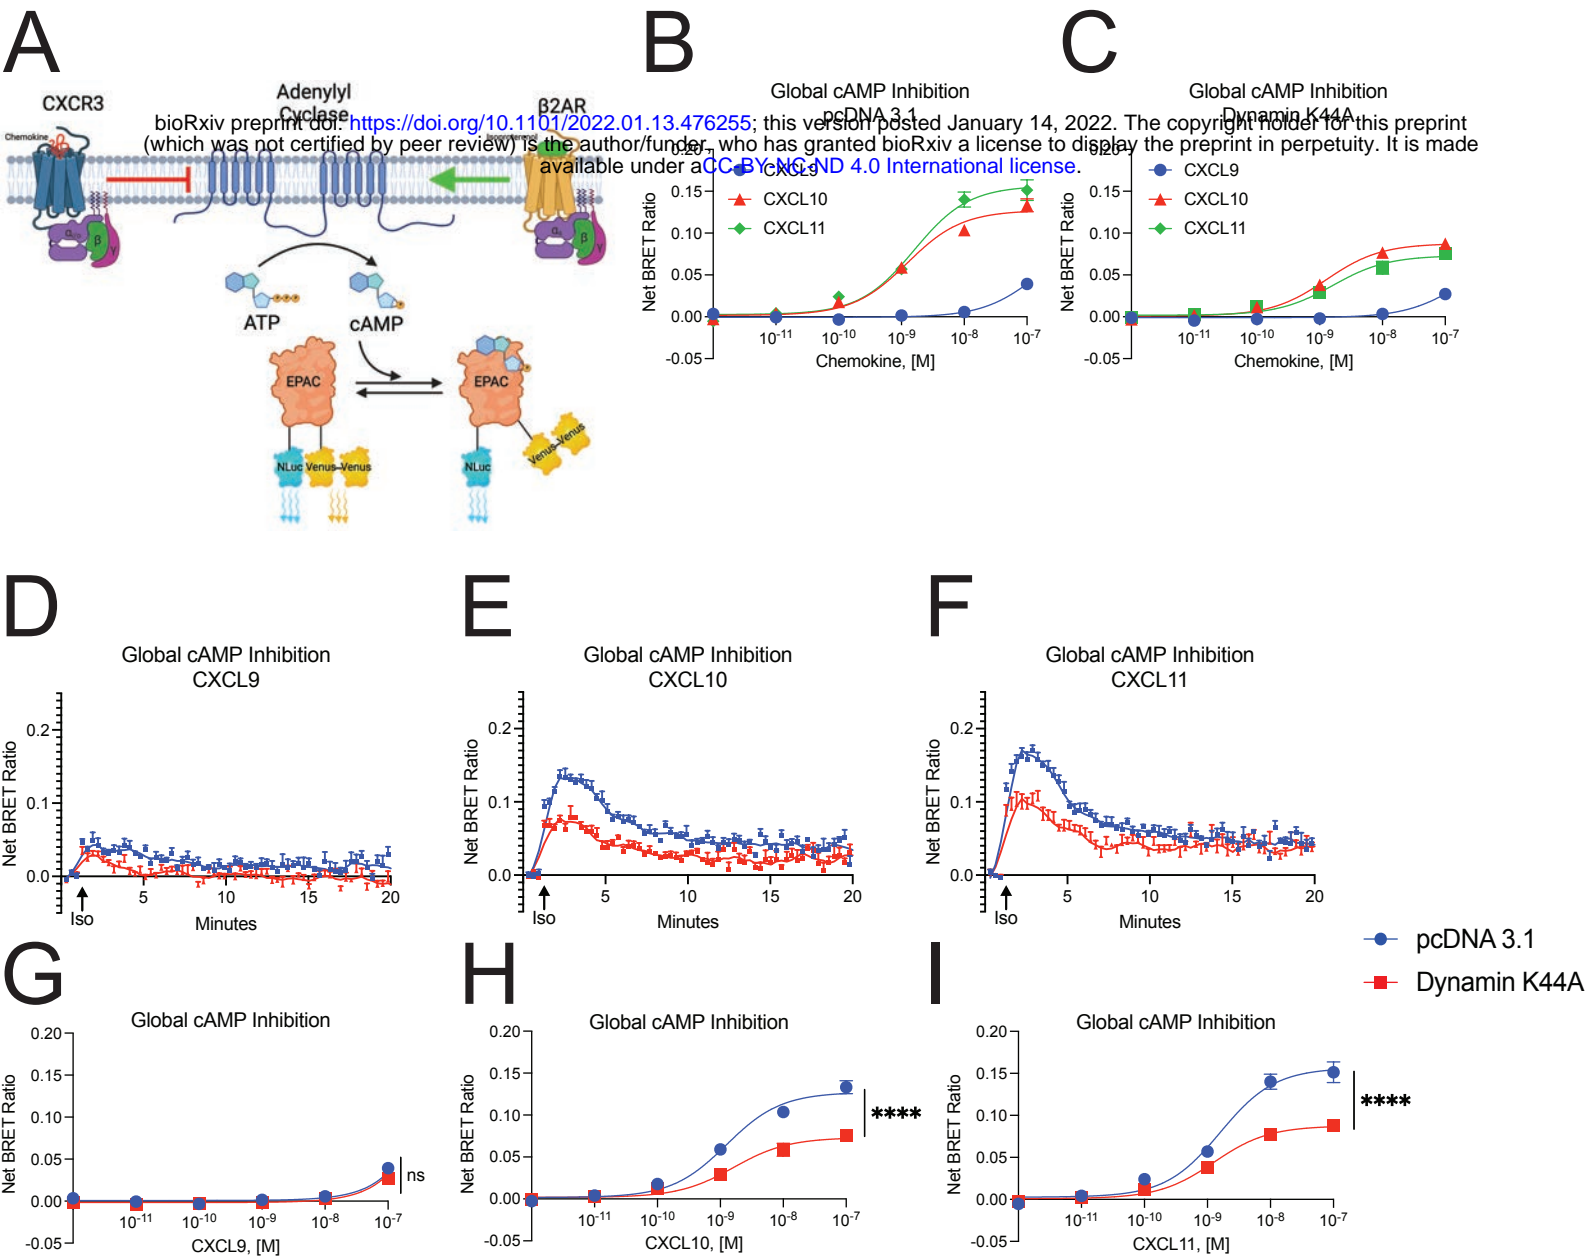

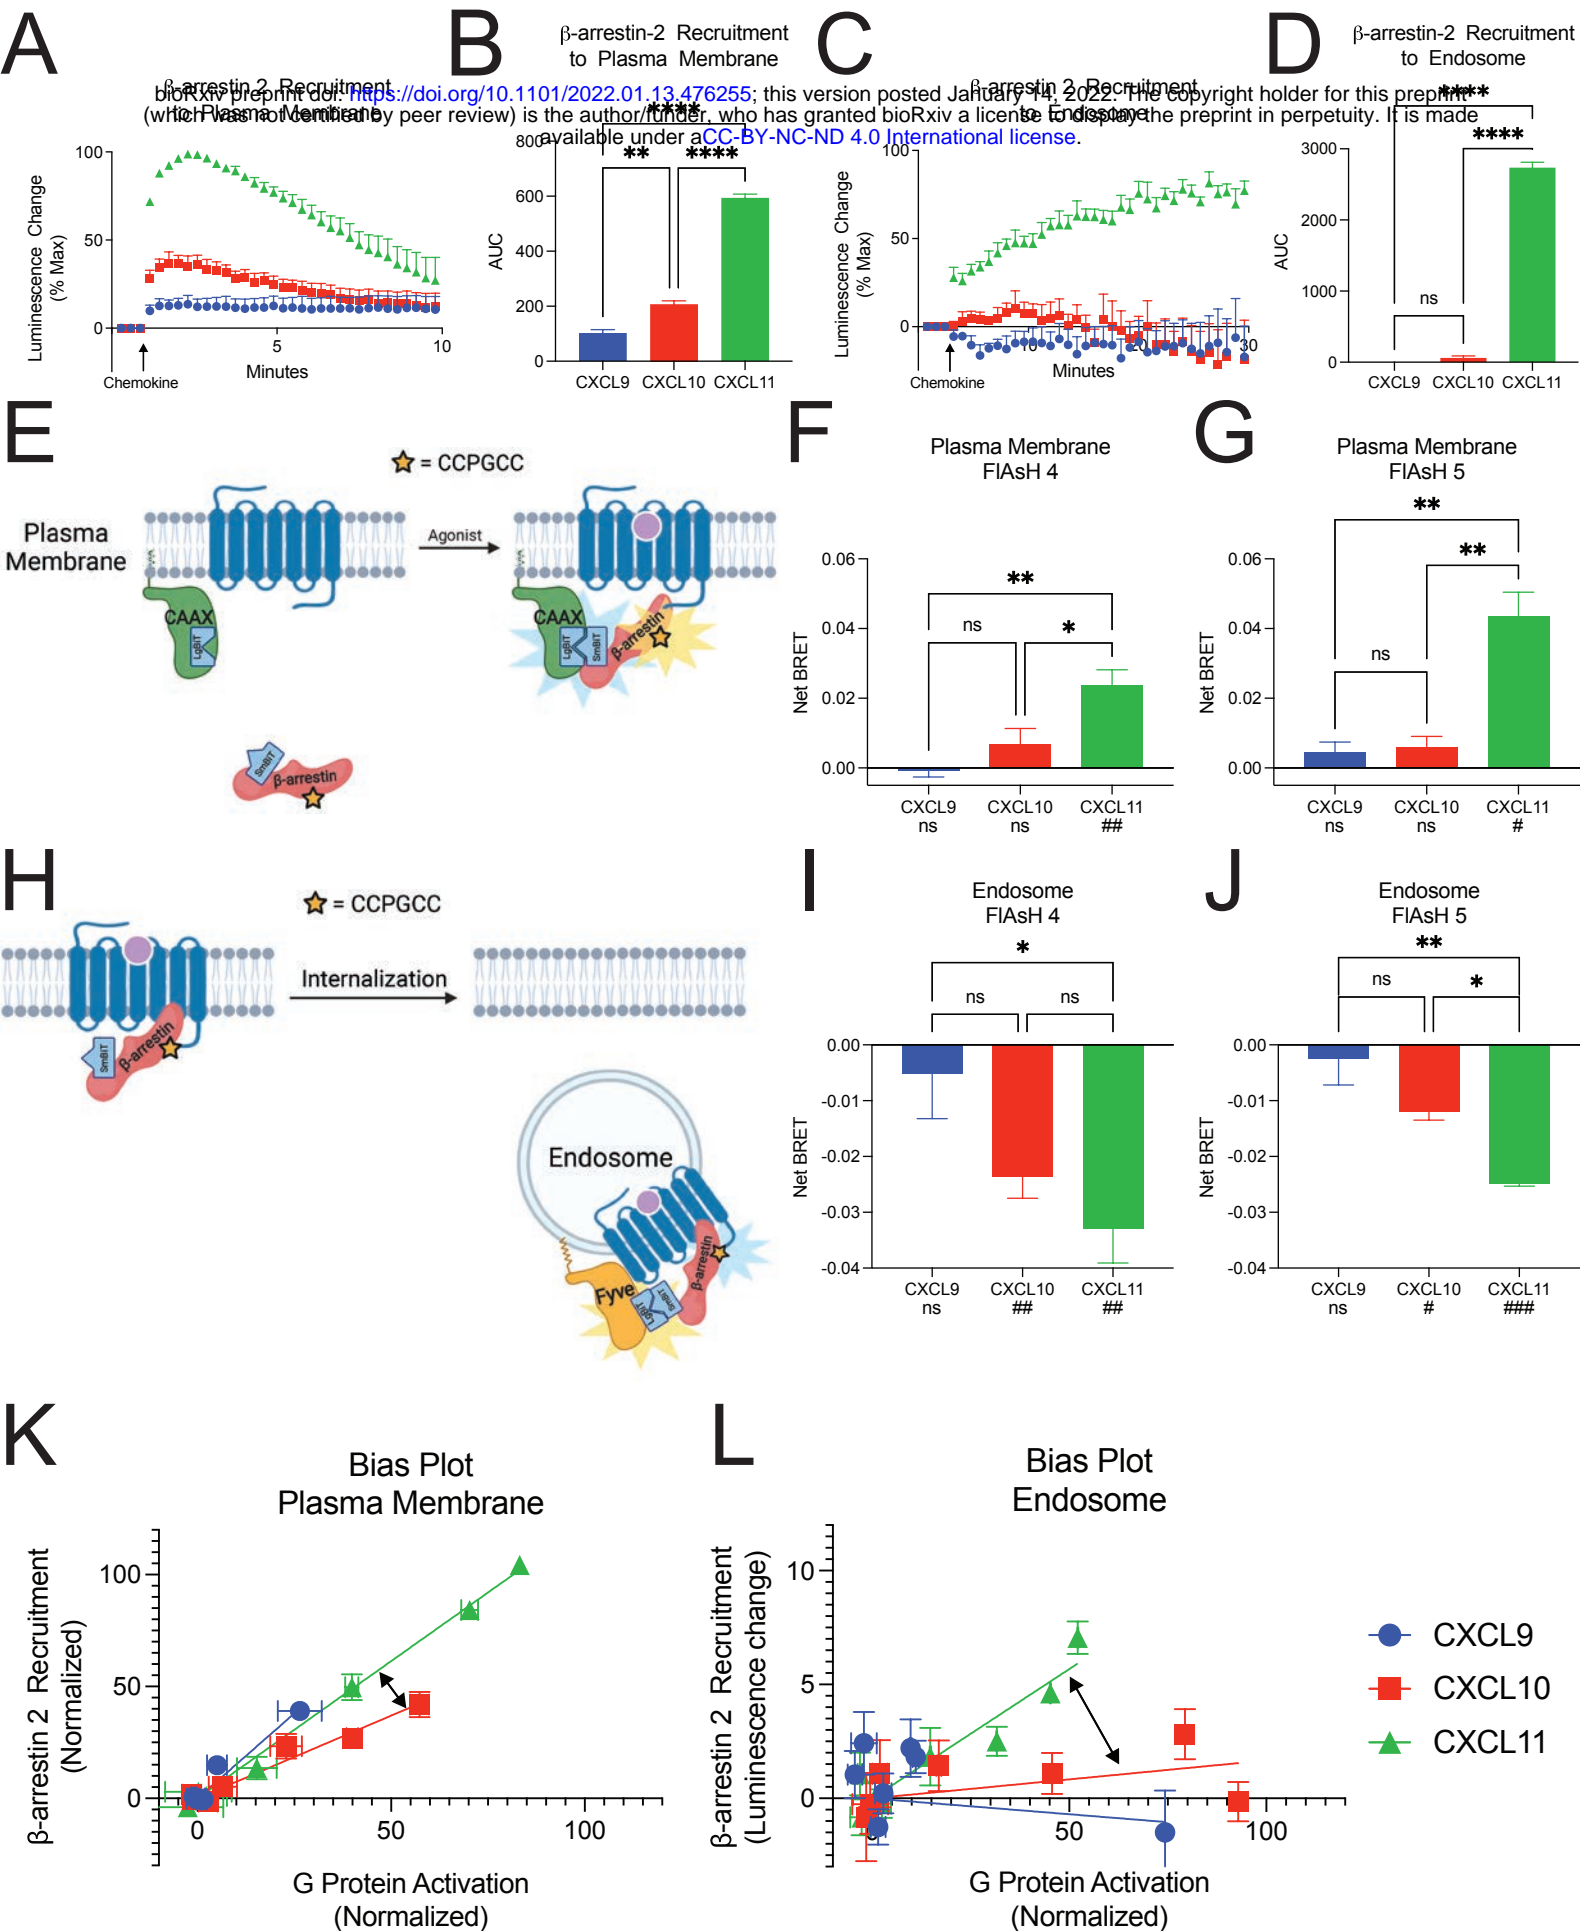

# FIGURE 5

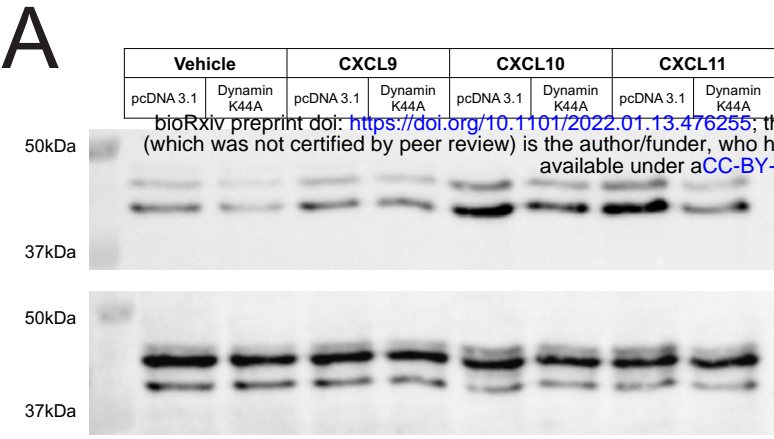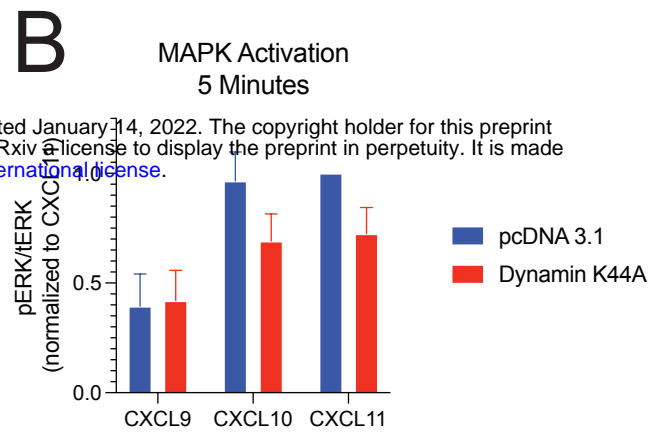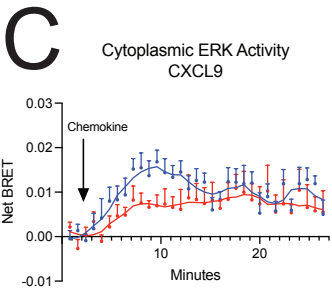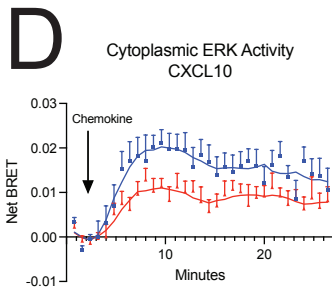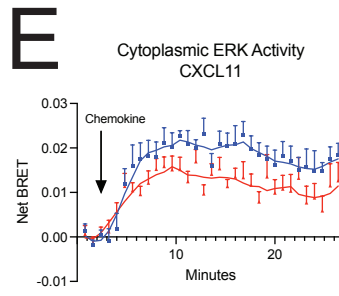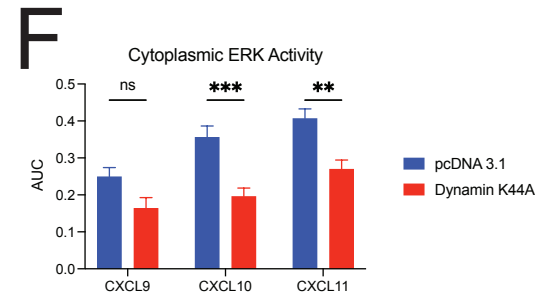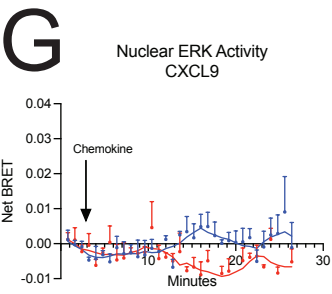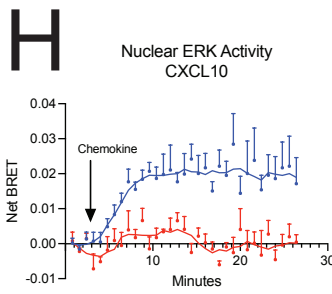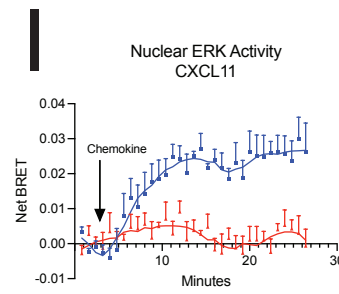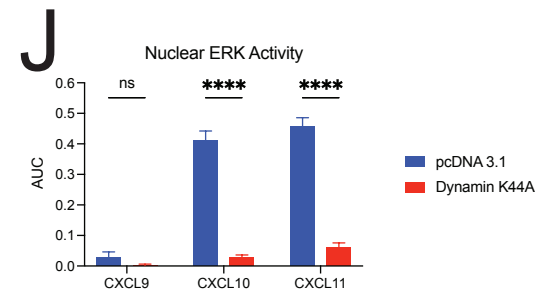



**FIGURE 6**

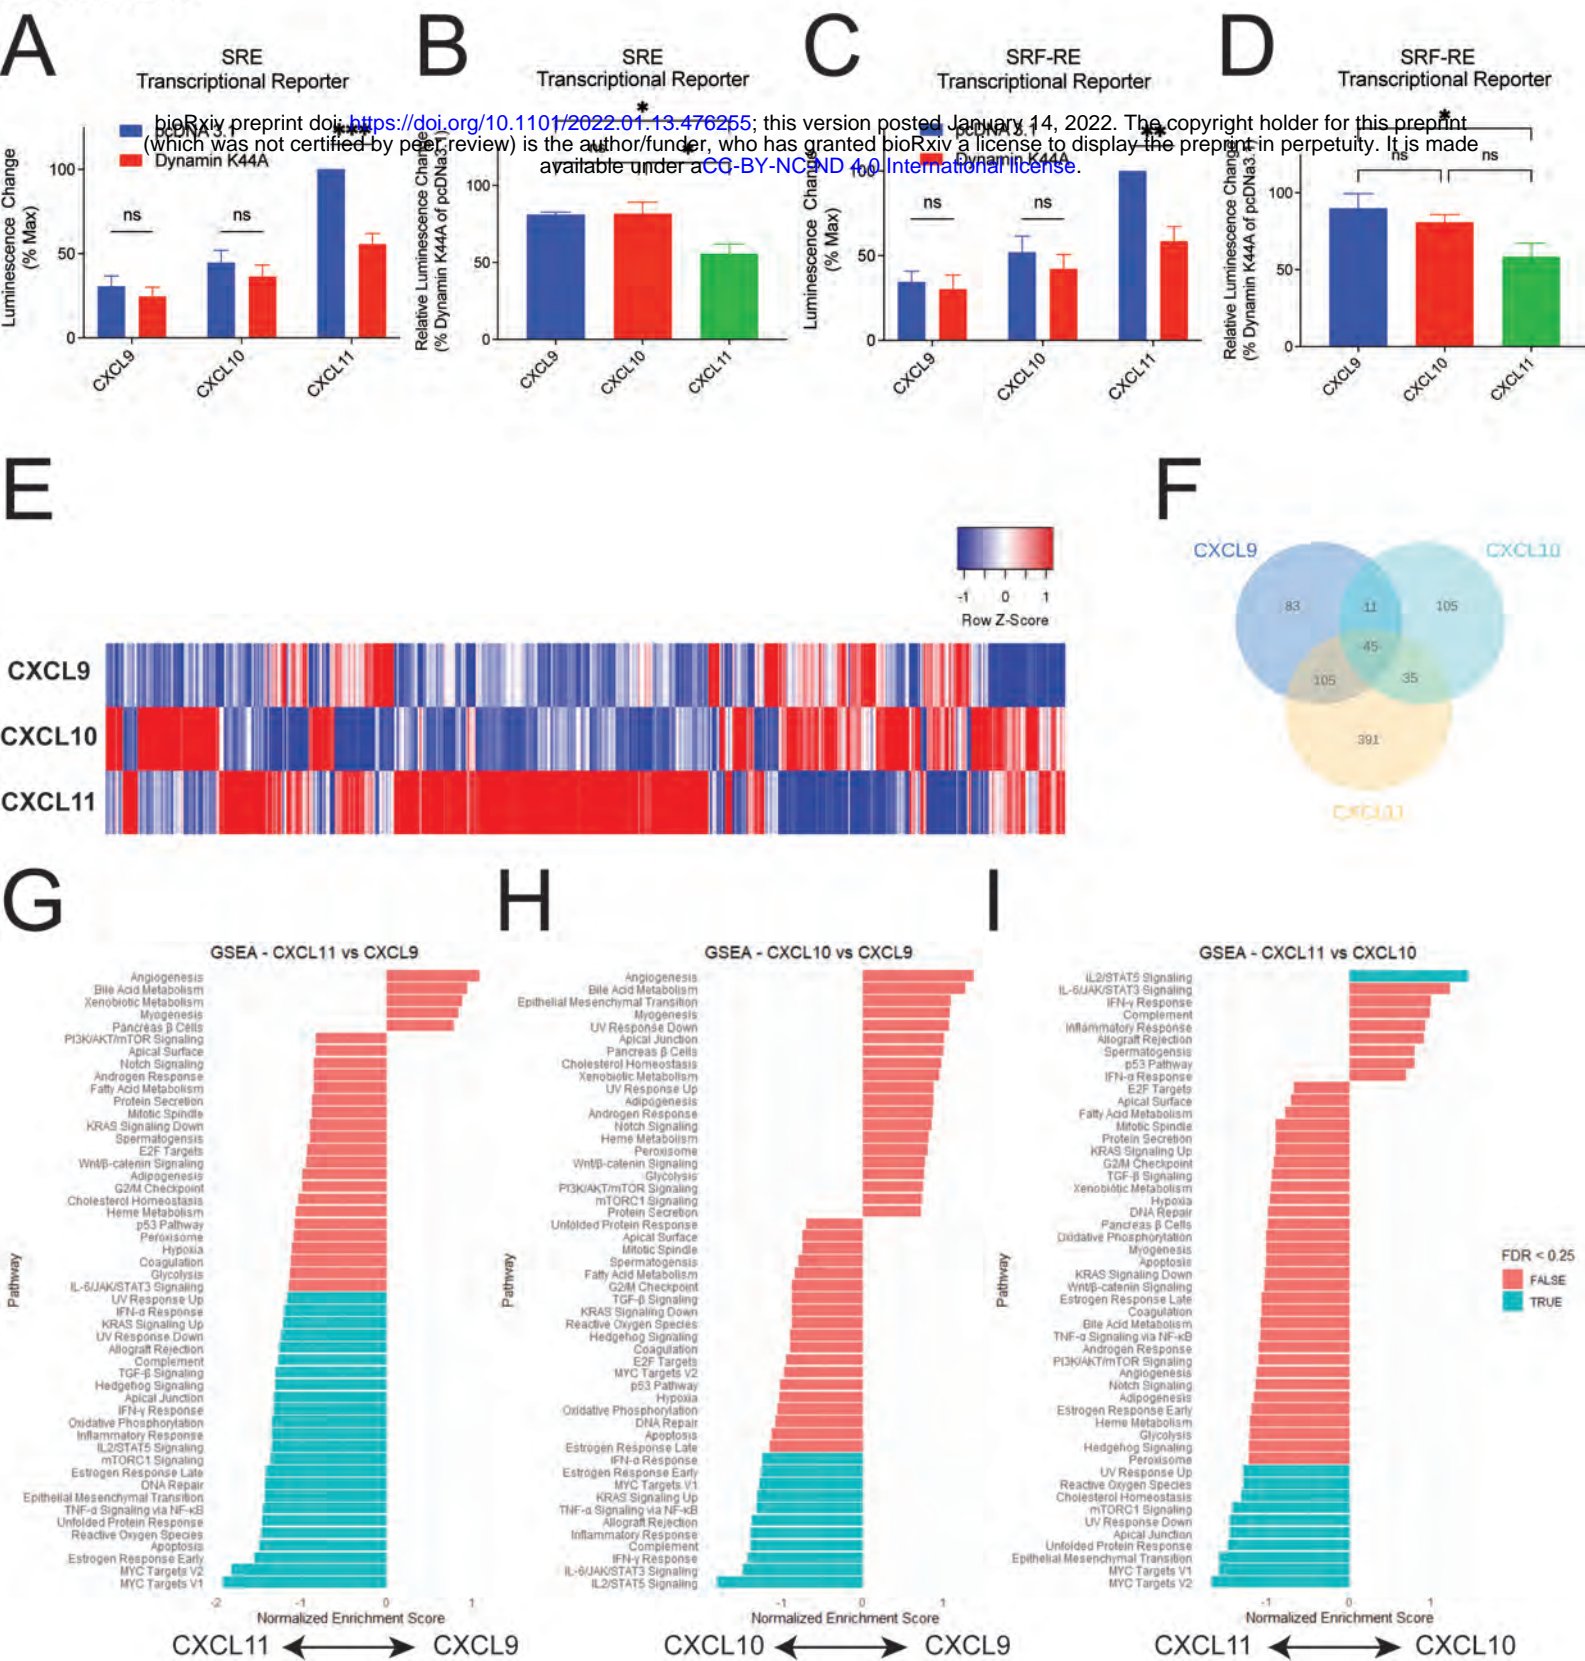

bioRxiv preprint doi: <https://doi.org/10.1101/2022.01.13.476255>; this version posted January 14, 2022. The copyright holder for this preprint (which was not certified by peer review) is the author/funder, who has granted bioRxiv a license to display the preprint in perpetuity. It is made available under aCC-BY-NC-ND 4.0 International license.

A

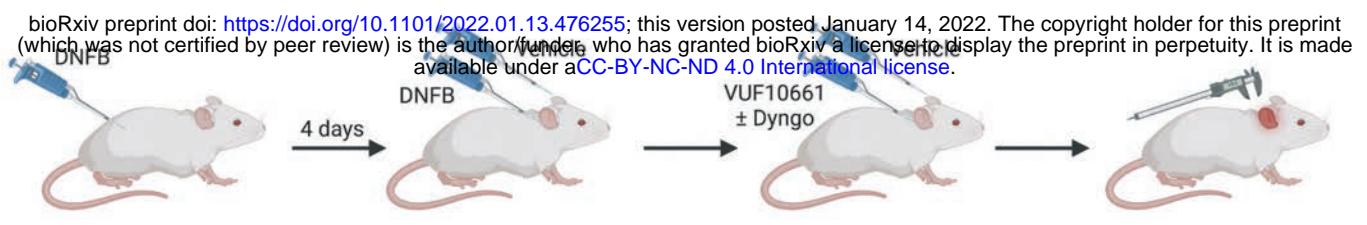

B

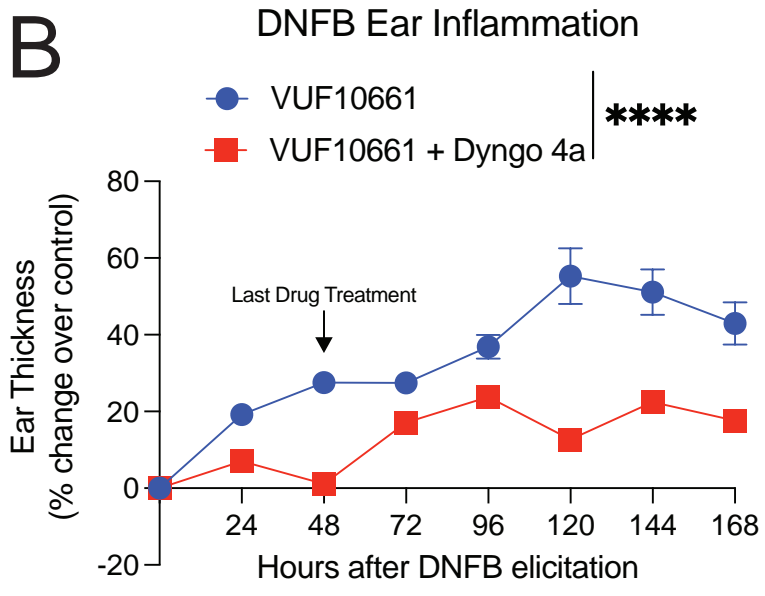

C

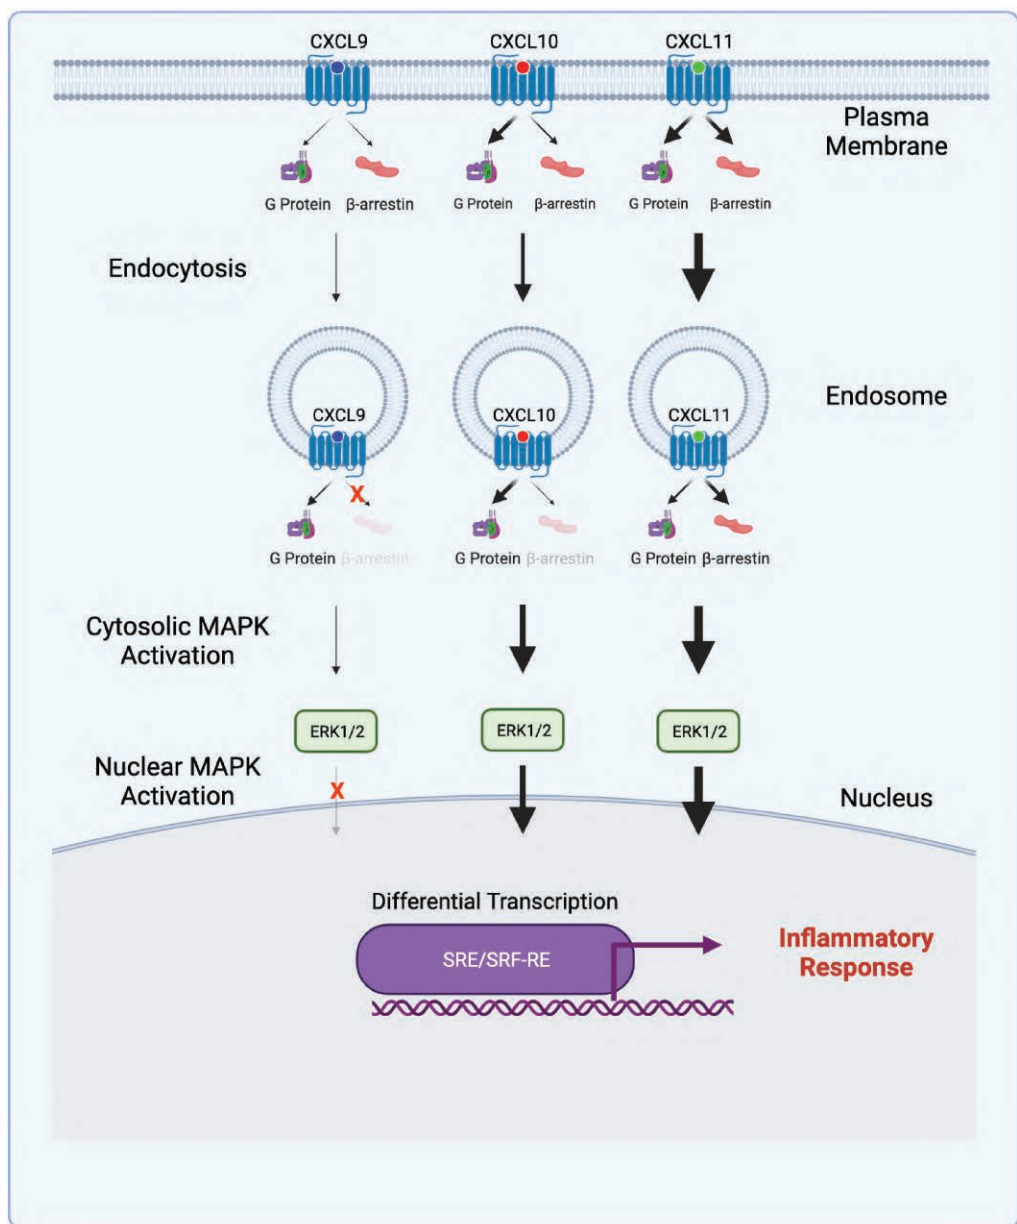

Source: https://www.biorxiv.org/content/10.1101/2022.01.13.476255v1.full.pdf
